# Supplementary material for: Soft detoxification of chemical warfare agent simulants and pesticides under pressure
Source: Royal Society of Chemistry journal article supplement (doi:10.1039/d2ob01217k), 2022-01-01
Supplement: d2ob01217k1.pdf [file d2ob01217k1.pdf]

## Supporting information

# Soft detoxification of chemical warfare agent simulants and pesticides under pressure

Sergui Mansour<sup>a</sup>, Valmir B. Silva,<sup>a,b</sup> Elisa S. Orth<sup>b,\*</sup> and Julien Legros<sup>a,\*</sup>

a. CNRS, Normandie Université, UNIROUEN, INSA Rouen, COBRA laboratory, F-76000 Rouen, France

E-mail: [julien.legros@univ-rouen.fr](mailto:julien.legros@univ-rouen.fr)

b. Departamento de Química, Universidade Federal do Paraná (UFPR), CP 19081, CEP 81531-990, Curitiba, PR, Brasil

## Table of content

|                                                                                          |    |
|------------------------------------------------------------------------------------------|----|
| General information .....                                                                | 3  |
| Preparation of starting materials .....                                                  | 5  |
| General Procedure for the neutralization of CWAs under high pressure .....               | 7  |
| General Procedure for the neutralization of phosphate triesters under high pressure..... | 7  |
| High field NMR Spectra .....                                                             | 11 |
| GC-MS results .....                                                                      | 34 |
| References.....                                                                          | 40 |

## General information

All reagent and CWA simulants (CEES, CTEA), and 4-nitrophenyl dimethyl phosphate (Methyl Paraoxon) were purchased from Sigma Aldrich and used as provided; solvents were purchased from VWR and used without further purification.

High-pressure reactions were performed in piston-cylinder type devices: U16 (Unipress, Warsaw, Poland), designed for  $P = 16$  kbar, and an Ollivaud/Lebas (France) for  $P = 14$  kbar.

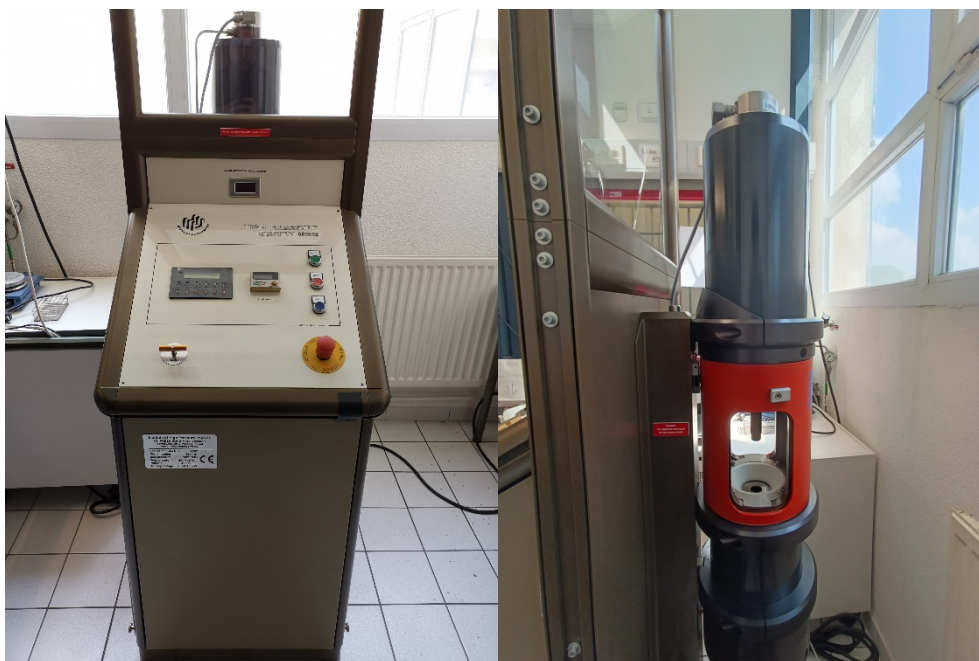

Figure 1. Pictures of piston-cylinder type apparatus U16 (Unipress, Warsaw, Poland): front (left) and side (right)

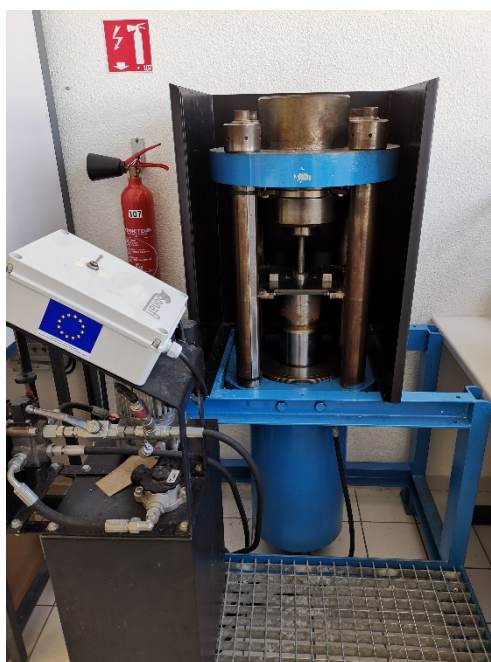

Figure 2. Piston-cylinder type apparatus Ollivaud/Lebas, France.

High field  $^1\text{H}$ ,  $^{13}\text{C}$ , and  $^{31}\text{P}$  NMR studies were performed on a 300 MHz Bruker Spectrospin spectrometer. Chemical shifts ( $\delta$ ) are given with regard to TMS using solvent as internal reference,  $J$  coupling constants are given in Hertz. Low resolution mass spectra and gas chromatograms were performed on a Shimadzu QP2010 hybrid ionization apparatus (HP5- MS stationary phase,  $l = 30$  cm,  $d = 0.25$  mm, film thickness =  $0.25$   $\mu\text{m}$ ).

All reactions were conducted at room temperature ( $23$   $^\circ\text{C}$ ) except if noted otherwise, with no particular precautions with regard to residual moisture and air. However due to the acute toxicity of CWA simulants, all reactions were carried out under closed atmosphere in a very well-ventilated fume hood. All glassware and materials in contact of simulants were immersed in a bleach bath under the fume hood for one day before further washing and/or disposal.

## Preparation of starting materials

### S-2-(Diisopropylamino)ethyl) O-ethyl phenylphosphonothioate (PhX)

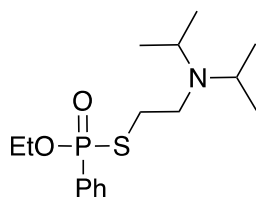

Prepared according to the literature,<sup>1</sup> pale yellow oil.

**<sup>1</sup>H NMR** (300 MHz, CDCl<sub>3</sub>) δ 7.93 – 7.78 (m, 2H), 7.57 – 7.37 (m, 3H), 4.31 – 4.13 (m, 2H), 2.97 – 2.79 (m, 2H), 2.64 (dd, *J* = 13.3, 7.0 Hz, 2H), 2.58 – 2.49 (m, 2H), 1.37 (s, 3H), 0.90 (d, *J* = 6.5 Hz, 12H)

**<sup>13</sup>C {<sup>1</sup>H} NMR** (75 MHz, CDCl<sub>3</sub>) δ 133.7 (d, *J*=148.8) 132.06 (d, *J* = 3.2 Hz), 130.89 (d, *J* = 10.8 Hz), 128.15 (d, *J* = 14.7 Hz), 61.67 (d, *J* = 6.8 Hz), 48.47 (s), 45.86 (d, *J* = 4.7 Hz), 30.98 (d, *J* = 2.1 Hz), 20.51 (t, *J* = 6.1 Hz), 16.08 (d, *J* = 6.7 Hz).

**<sup>31</sup>P NMR** (121 MHz, CDCl<sub>3</sub>) δ = 45.4 (m)

**HRMS** calc *m/z*: 330.1657 ([*M*+*H*]<sup>+</sup>), found 330.1657 (0.0 ppm)

### Diethyl 2,4-Dinitrophenyl phosphate (DEDNPP)

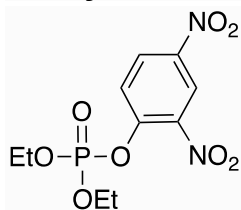

It was prepared according to the procedure described in literature, using THF as solvent instead benzene. The product was purified by flash chromatography (4:1 cyclohexane/ethyl acetate and 0.2% acetic acid; 56% yield (yellow solid), mp < 40 °C.<sup>2</sup>

**<sup>1</sup>H NMR** (300 MHz, CDCl<sub>3</sub>) δ 1.40 (td *J*<sub>HH</sub> = 7.05 Hz, *J*<sub>HP</sub> = 1.17 Hz, 6H), 4.22-4.37 (m, 4H), 7.85 (dd, *J*<sub>HH</sub> = 9.15 Hz, *J*<sub>HH</sub> = 1.05 Hz), 8.47 (ddd, *J*<sub>HH</sub> = 9.15 Hz, *J*<sub>HH</sub> = 2.77, *J*<sub>HP</sub> = 0.39 Hz, 1H), 8.83 (dd, *J*<sub>HH</sub> = 2.77 Hz, *J*<sub>HP</sub> = 1.05 Hz, 1H)

**<sup>13</sup>C NMR** (75 MHz, CDCl<sub>3</sub>): 16.1 (d, *J* = 6.75), 65.2 (d, *J* = 6.26); 120.6 (d, *J* = 5.54); 125.7 (s); 144.7 (s); 155.6 (d, *J* = 6.34)

**<sup>31</sup>P NMR** (121 MHz, CDCl<sub>3</sub>): -7.5 (quint, 8.4 *J*<sub>PH</sub>)

**HRMS** calc *m/z*: 321.0488 Da ([*M*+*H*]<sup>+</sup>), found 321.0488 (0.0 ppm)

## Diethyl 4-nitrophenyl phosphate (Paraoxon)

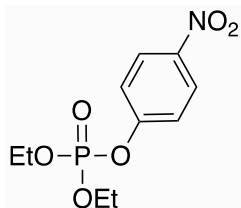

It was prepared according to the procedure employed for the DEDNPP; see above. The product was purified by flash chromatography (3:2 cyclohexane/ethyl acetate and 0.2% acetic acid; 68% yield) (yellow liquid).<sup>2</sup>

**<sup>1</sup>H NMR** (300 MHz, CDCl<sub>3</sub>) δ (td J<sub>HH</sub> = 7.05, J<sub>HP</sub> = 1.03, 6H), 4.27 (m, 4H), 7.73 and 8.17 (AA'BB', 4H).

**<sup>13</sup>C NMR** (75 MHz, CDCl<sub>3</sub>): 16.0 (d, J = 6.69), 66.1 (d, J = 6.66), 127.7 (s), 123.4 (d, J = 2.63), 128.8 (d, J = 0.90), 143.6 (s), 148.3 (d, J = 4.96).

**<sup>31</sup>P NMR** (121 MHz, CDCl<sub>3</sub>): -6.5 (qu, 8.5 J<sub>PH</sub>).

**HRMS** calc m/z: 276.0637 Da ([M+H]<sup>+</sup>), found 276.0616 (-7.6 ppm)

## General Procedure for the neutralization of CWAs under high pressure

The mixture of CWAs (0.125 mmol for CTEA and DEAE and 0.044 mmol for PhX), and the nucleophile (0.375 mmol of pyrrolidine or EtOLi) were dissolved in dry ethanol (1 mL)<sup>1</sup> in a Teflon reaction vessel (0.9 mL) and submitted to a pressure of 14-16 kbar at room temperature. After 24 h, pressure was released, reaction medium was extracted (H<sub>2</sub>O/diethyl ether, 3x2 mL) and volatiles were removed in vacuo before GC (decane is used as an internal standard, 0.125 mmol) and NMR analysis.

## General Procedure for the neutralization of phosphate triesters under high pressure

**Solvolysis reactions.** A solution containing the phosphate triester (Paraoxon, Methyl Paraoxon or DEDNPP) (4.7 mmol L<sup>-1</sup> in MeCN/H<sub>2</sub>O, 99:1, v/v) was prepared and placed in a Teflon reaction vessel (2.5 or 2.7 mL). The reaction mixture was kept under 14 kbar or 16 kbar, at room temperature for 24 h. Then, the solvent was removed under reduced pressure, the residues were dissolved in CDCl<sub>3</sub> and analyzed by <sup>1</sup>H and <sup>31</sup>P NMR. The product ratio was calculated from <sup>31</sup>P NMR spectra.

**Reactions with imidazole.** A solution containing imidazole (28 mmol L<sup>-1</sup>; 6 equivalents) and the phosphate triester (4.7 mmol L<sup>-1</sup>; 1 equivalent) was prepared and placed in a Teflon reaction vessel (2.5 or 2.7 mL). The reaction mixture was kept under 14 kbar or 16 kbar, at room temperature for 24 h. Then, the solvent was removed under reduced pressure, the residues were dissolved in deuterium oxide and analyzed by <sup>1</sup>H and <sup>31</sup>P NMR. The product ratio was calculated from <sup>31</sup>P NMR spectra.

### Diethyl phenylphosphonate (1)

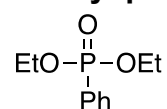

Viscous colorless liquid.

**<sup>1</sup>H NMR** (300 MHz, CDCl<sub>3</sub>) δ 7.94 – 7.63 (m, J = 13.3, 7.0 Hz, 2H), 7.53 – 7.10 (m, 3H), 4.21 – 3.80 (m, 4H), 1.23 (t, J = 7.1 Hz, 6H)

**<sup>13</sup>C {<sup>1</sup>H} NMR** (75 MHz, CDCl<sub>3</sub>) δ 132.14 (d, J = 2.6 Hz), 131.44 (d, J = 9.9 Hz), 128.21 (d, J = 15.0 Hz), 128.04 (d), 61.83 (d, J = 5.4 Hz), 16.02 (d, J = 6.4 Hz).

**<sup>31</sup>P{<sup>1</sup>H} NMR** (121 MHz, CDCl<sub>3</sub>) δ = 18.74 (S)

**HRMS** calc m/z: 215.0837 Da ([M+H]<sup>+</sup>), found 215.0833 (1.8 ppm)

Data in accordance to literature.<sup>3</sup>

---

<sup>1</sup> Commercial absolute ethanol > 99.7% was dried over molecular sieves before use.

### Triethyl phosphate (2)

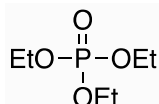

**<sup>1</sup>H NMR** (300 MHz, CDCl<sub>3</sub>) δ 1.27 (td  $J_{\text{HH}} = 7.1$  Hz,  $J_{\text{HP}} = 0.89$  Hz, 9H), 4.04 (dq,  $J_{\text{HP}} = 7.9$  Hz,  $J_{\text{HH}} = 7.1$  Hz, 6H).

**<sup>31</sup>P{<sup>1</sup>H} NMR**: -0.9 (s)

Data in accordance to literature.<sup>3</sup>

### Diethyl phosphate (3b)

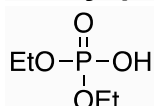

**<sup>1</sup>H NMR** (300 MHz, CDCl<sub>3</sub>) δ 1.27 (t  $J_{\text{HH}} = 6.9$  Hz, 6H), 3.95 - 4.06 (m, 4H).

**<sup>31</sup>P{<sup>1</sup>H} NMR** (121 MHz, CDCl<sub>3</sub>): 0.6 (s)

Data in accordance to literature.<sup>4</sup>

### Dimethyl phosphate (3c)

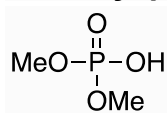

**<sup>1</sup>H NMR** (300 MHz, D<sub>2</sub>O) δ 3.55 (t  $J_{\text{HP}} = 10.7$  Hz, 6H)

**<sup>31</sup>P{<sup>1</sup>H} NMR** (121 MHz, D<sub>2</sub>O): 3.6 (s)

Data in accordance to literature.<sup>5</sup>

### Methyl phosphate (5c)

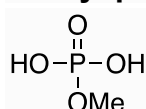

**<sup>1</sup>H NMR** (300 MHz, D<sub>2</sub>O) δ 3.44 (t  $J_{\text{HP}} = 10.1$  Hz, 3H)

**<sup>31</sup>P{<sup>1</sup>H} NMR** (121 MHz, D<sub>2</sub>O): 4.7 (s)

Data in accordance to literature.<sup>6</sup>

### Ethyl 4-nitrophenyl hydrogen phosphate (4b)

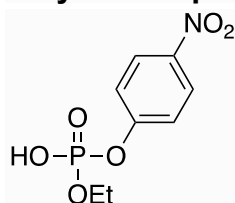

**<sup>1</sup>H NMR** (300 MHz, CDCl<sub>3</sub>) δ 1.25(dt  $J_{\text{HH}} = 7.1$  Hz,  $J_{\text{HP}} = 1.0$  Hz, 3H), 4.01 (m, 2H), 7.28 and 8.12 (AA'BB', 4H).



**$^{31}\text{P}\{^1\text{H}\}$  NMR** (121 MHz,  $\text{CDCl}_3$ ): -7.1 (s)

Data in accordance to literature, slight shifted due to the solvent.<sup>7</sup>

### Methyl 4-nitrophenyl hydrogen phosphate (4c)

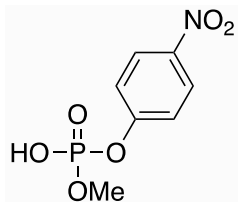

**$^1\text{H}$  NMR** (300 MHz,  $\text{CDCl}_3$ )  $\delta$  3.91 (d,  $J_{\text{HP}} = 11.5$  Hz 6H), 7.33 and 8.20 (AA'BB', 4H).

**$^{31}\text{P}\{^1\text{H}\}$  NMR** (121 MHz,  $\text{CDCl}_3$ ): -5.5 (bs)

### 4-Nitrophenol ( $\text{C}_6\text{H}_5\text{NO}_3$ )

**$^1\text{H}$  NMR** (300 MHz,  $\text{CDCl}_3$ ): 6.89 and 8.14 (AA'BB', 4H).

Data in accordance to literature.<sup>8</sup>

### 2,4-Dinitrophenol

**$^1\text{H}$  NMR** (300 MHz,  $\text{CDCl}_3$ )  $\delta$  7.27 (d  $J = 9.3$  Hz, 1H), 8.39 (d of d,  $J = 9.3$ ,  $J = 2.7$ , 1H), 9.01 (d  $J = 2.7$  Hz, 1H).

Data in accordance to literature.<sup>9</sup>

### N-Methyl imidazole

**$^1\text{H}$  NMR** (300 MHz,  $\text{D}_2\text{O}$ ):  $\delta$  3.73 (s, 3H), 7.10 (s, 1H), 7.17 (s, 1H), 7.89 (s, 1H).

Data in accordance to literature.<sup>10</sup>

### 1-Ethoxy-2-(ethylthio)ethane (6a)

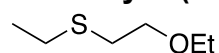

Viscous pale yellow liquid.

**$^1\text{H}$  NMR** (300 MHz,  $\text{CDCl}_3$ )  $\delta$  3.65 – 3.37 (m, 4H), 2.76 – 2.48 (m, 4H), 1.20 (dt,  $J = 15.8$ , 7.2 Hz, 6H).

**$^{13}\text{C}$  NMR** (75 MHz,  $\text{CDCl}_3$ )  $\delta$  77.58 (s), 77.16 (s), 76.74 (s), 70.30 (s), 66.39 (s), 31.23 (s), 26.48 (s), 15.24 (s), 14.94 (s).

**HRMS** calc  $m/z$ : 134.0765 Da (M), found 134.0767 (1.5 ppm)

### 1-[2-(Ethylthio)ethyl]-pyrrolidine (6b)

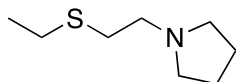

Viscous pale yellow liquid.

**<sup>1</sup>H NMR** (300 MHz, CDCl<sub>3</sub>) δ 2.48 (s, 4H), 2.35 (td, J = 7.0, 2.7 Hz, 6H), 1.67 – 1.50 (m, 4H), 1.07 (t, J = 7.4 Hz, 3H).

**<sup>13</sup>C {<sup>1</sup>H} NMR** (75 MHz, CDCl<sub>3</sub>) δ 77.58 (s), 77.16 (s), 76.73 (s), 56.18 (s), 53.88 (s), 30.32 (s), 25.91 (s), 23.22 (s), 14.64 (s).

**HRMS** calc m/z: 160.1160 Da ([M+H]<sup>+</sup>), found 160.1147 (8 ppm)

### 2-Ethoxy-N,N-diethylethanamine (7a)

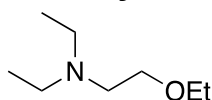

Viscous pale yellow liquid

**<sup>1</sup>H NMR** (300 MHz, CDCl<sub>3</sub>) δ 3.44 (q, J = 6.8 Hz, 4H), 2.64 – 2.44 (m, 6H), 1.14 (t, J = 7.0 Hz, 3H), 0.97 (t, J = 7.1 Hz, 6H).

**<sup>13</sup>C {<sup>1</sup>H} NMR** (75 MHz, CDCl<sub>3</sub>) δ 77.58 (s), 77.16 (s), 76.74 (s), 69.09 (s), 66.49 (s), 52.39 (s), 47.71 (s), 15.22 (s), 11.71 (s).

**HRMS** calc m/z: 146.1545 Da ([M+H]<sup>+</sup>), found 146.1538 (5 ppm)

### N,N-Diethyl-1-pyrrolidineethanamine (7b)

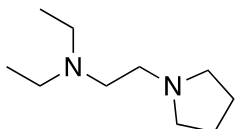

Viscous yellow pale liquid

**<sup>1</sup>H NMR** (300 MHz, CDCl<sub>3</sub>) δ 2.53 – 2.27 (m, 12H), 1.62 (t, J = 3.4 Hz, 4H), 0.88 (t, J = 7.2 Hz, 6H).

**<sup>13</sup>C {<sup>1</sup>H} NMR** (75 MHz, CDCl<sub>3</sub>) δ 77.59 (s), 77.16 (s), 76.74 (s), 54.52 (s), 54.46 (s), 51.86 (s), 47.41 (s), 23.27 (s), 11.66 (s).

**HRMS** calc m/z: 171.1861 Da ([M+H]<sup>+</sup>), found 171.1858 (1.7 ppm)

# High field NMR Spectra

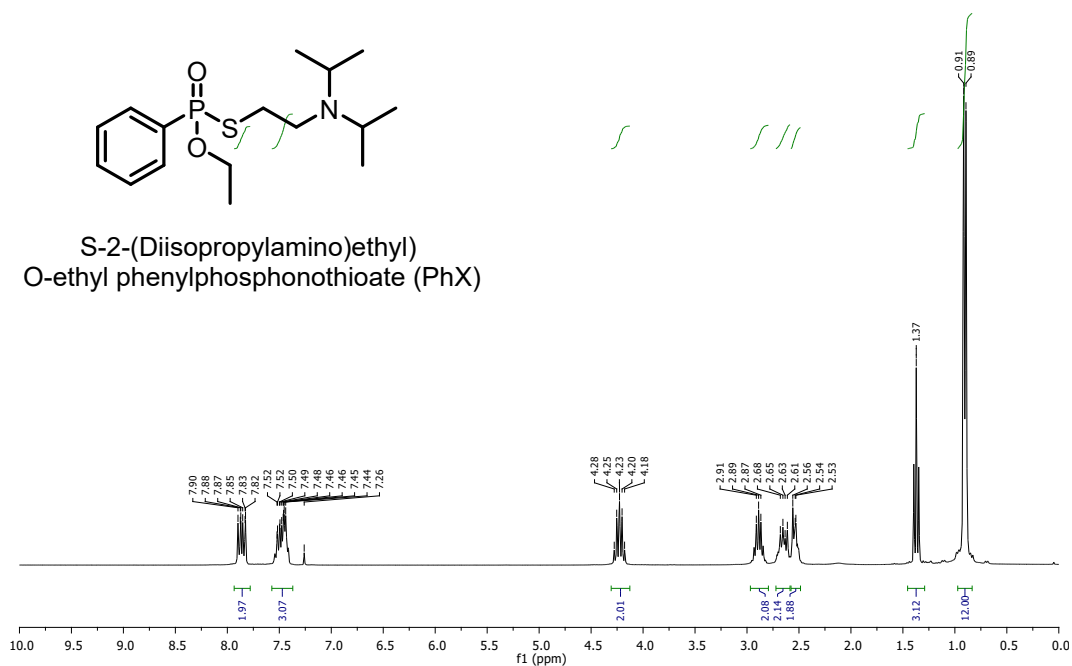

**<sup>1</sup>H NMR (300 MHz, CDCl<sub>3</sub>) of S-2-(Diisopropylamino)ethyl O-ethyl phenylphosphonothioate (PhX)**

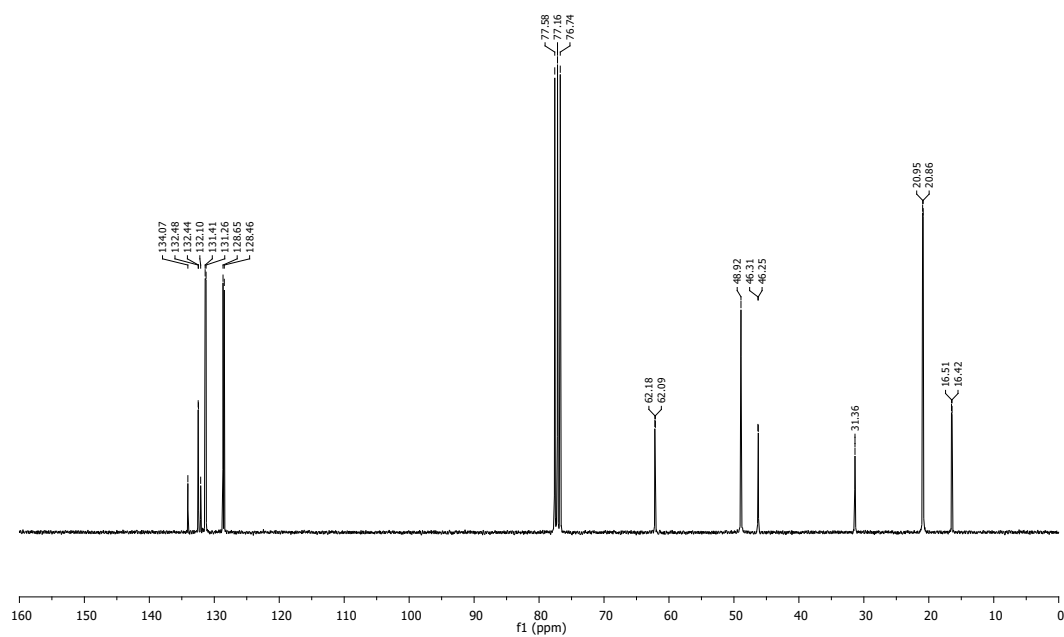

**<sup>13</sup>C {<sup>1</sup>H} NMR (75 MHz, CDCl<sub>3</sub>) of S-2-(Diisopropylamino)ethyl O-ethyl phenylphosphonothioate (PhX)**

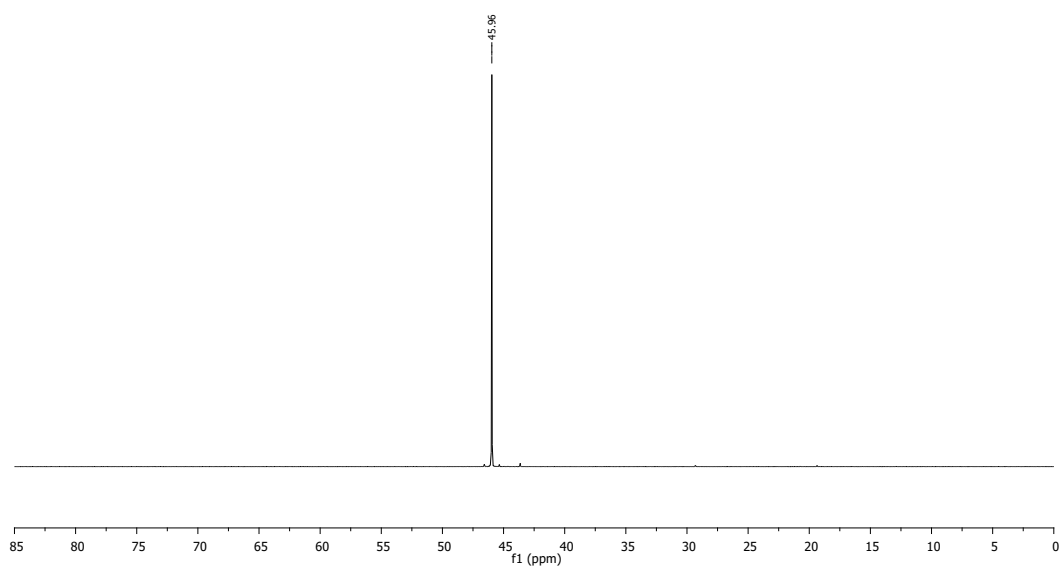

$^{31}\text{P}$  NMR (121 MHz,  $\text{CDCl}_3$ ) of S-2-(Diisopropylamino)ethyl O-ethyl phenylphosphonothioate (PhX)

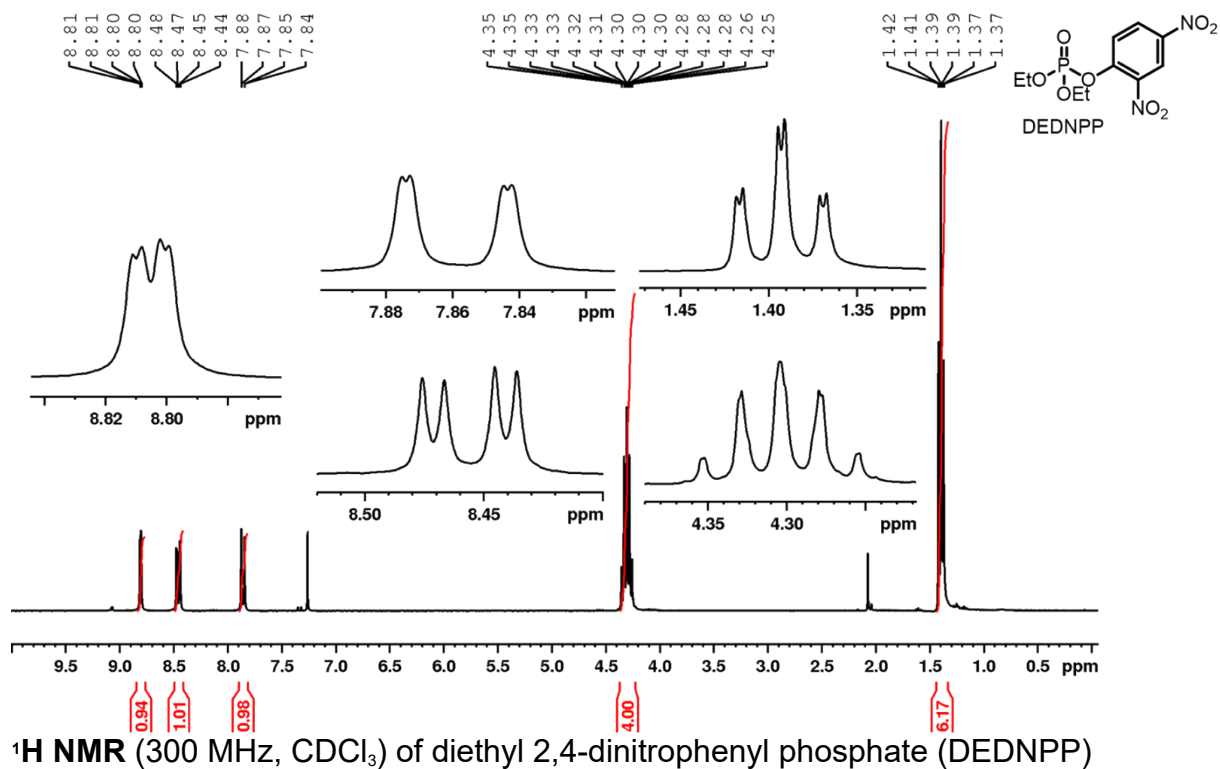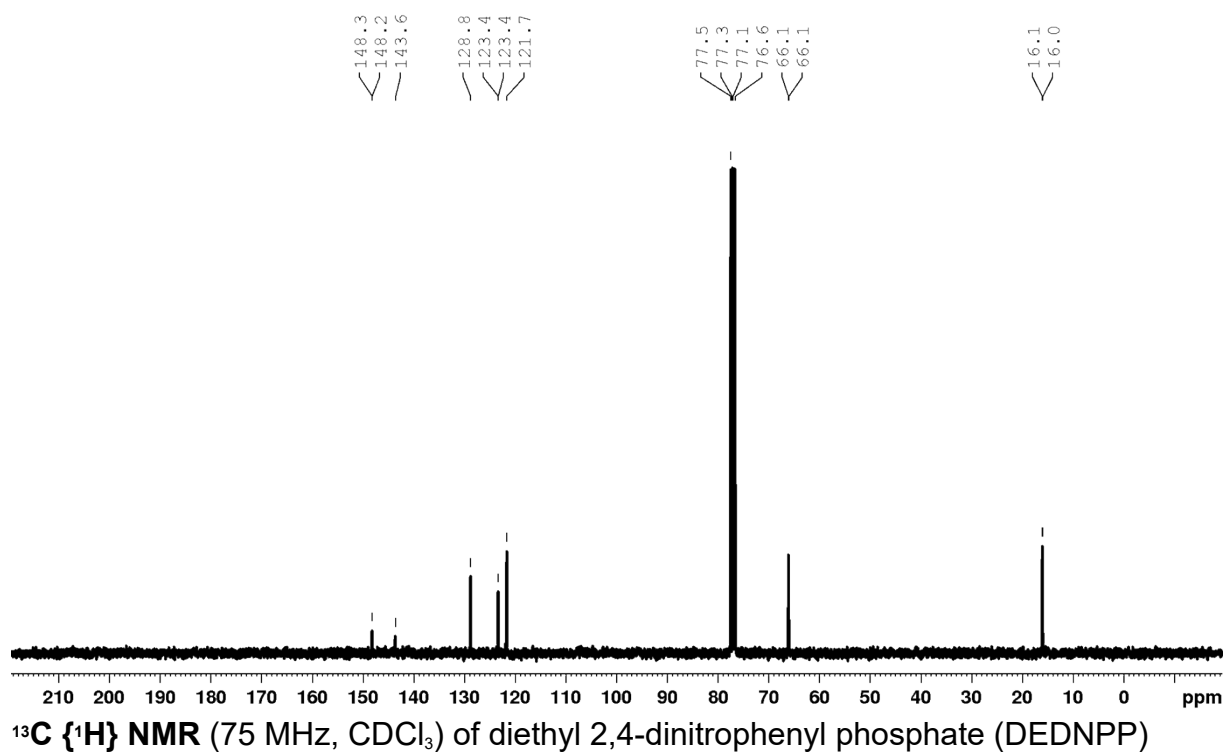

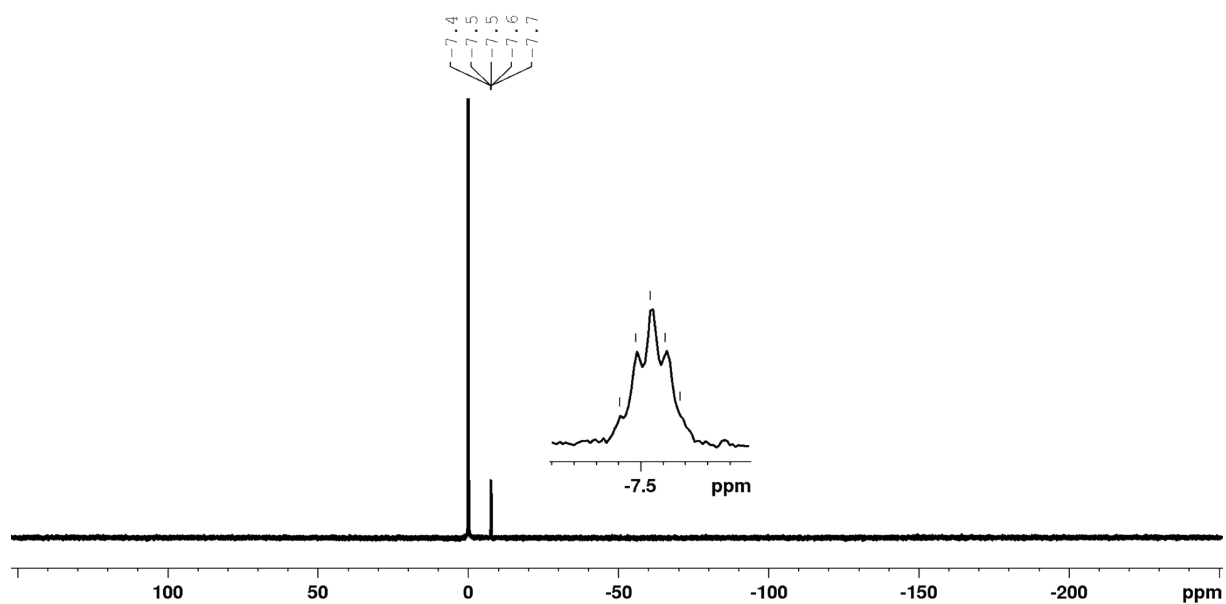

$^{31}\text{P}$  NMR (121 MHz,  $\text{CDCl}_3$ ) of diethyl 2,4-dinitrophenyl phosphate (DEDNPP) (with  $\text{H}_3\text{PO}_4$  as reference,  $\delta = 0$  ppm)

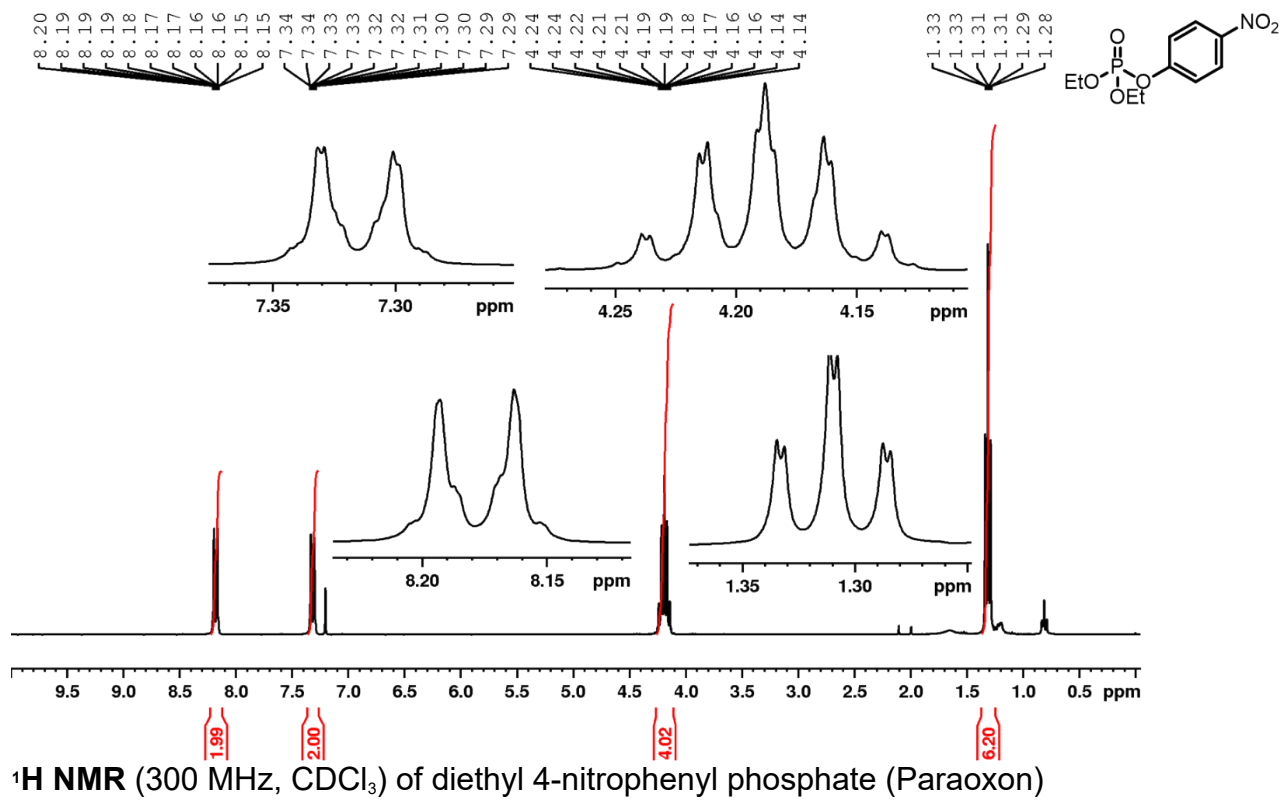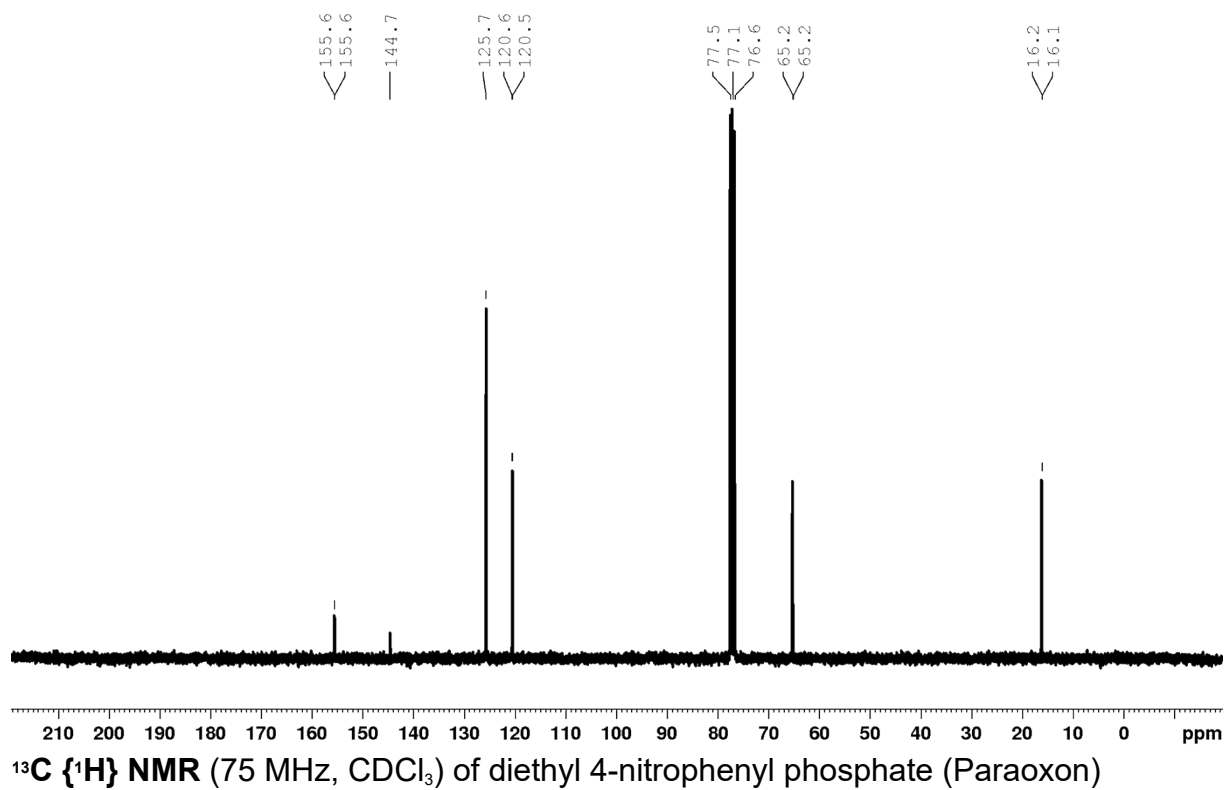

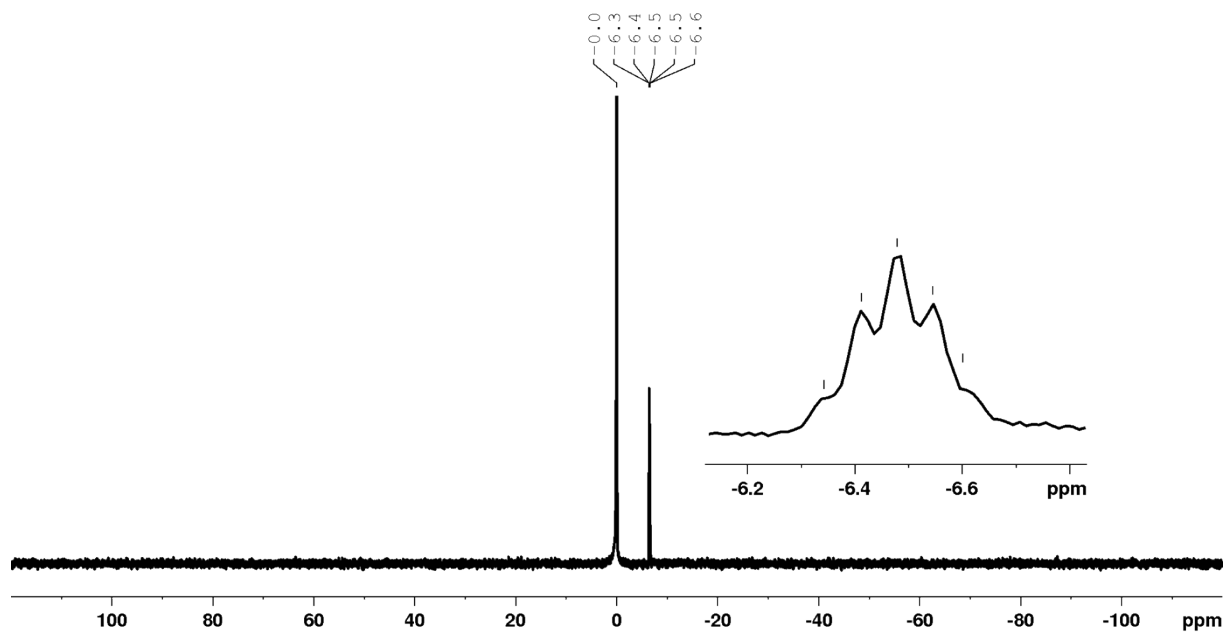

$^{31}\text{P}$  NMR (121 MHz,  $\text{CDCl}_3$ ) of diethyl 4-nitrophenyl phosphate (Paraoxon) (with  $\text{H}_3\text{PO}_4$  as reference,  $\delta = 0$  ppm)



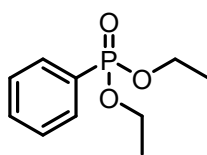

Diethyl phenylphosphonate

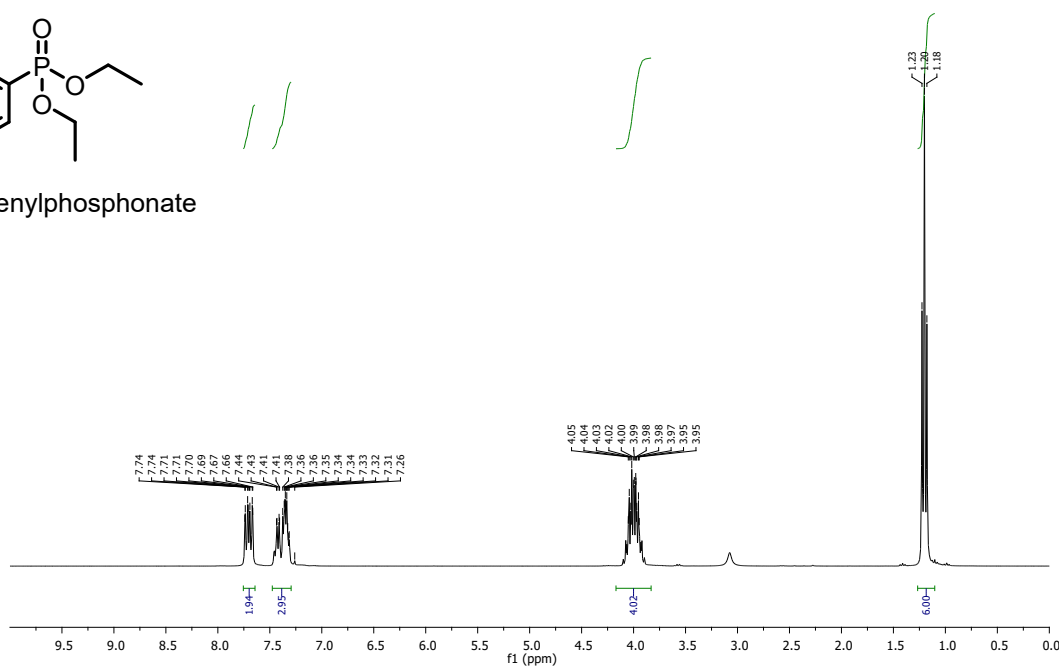

$^1\text{H}$  NMR (300 MHz,  $\text{CDCl}_3$ ) of diethyl phenylphosphonate

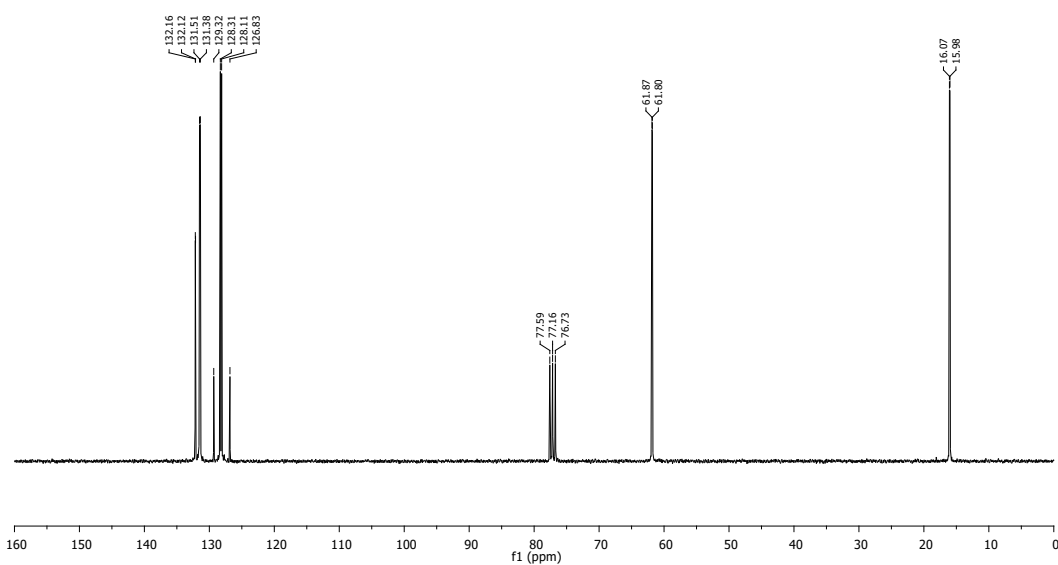

$^{13}\text{C}$   $\{^1\text{H}\}$  NMR (75 MHz,  $\text{CDCl}_3$ ) of diethyl phenylphosphonate

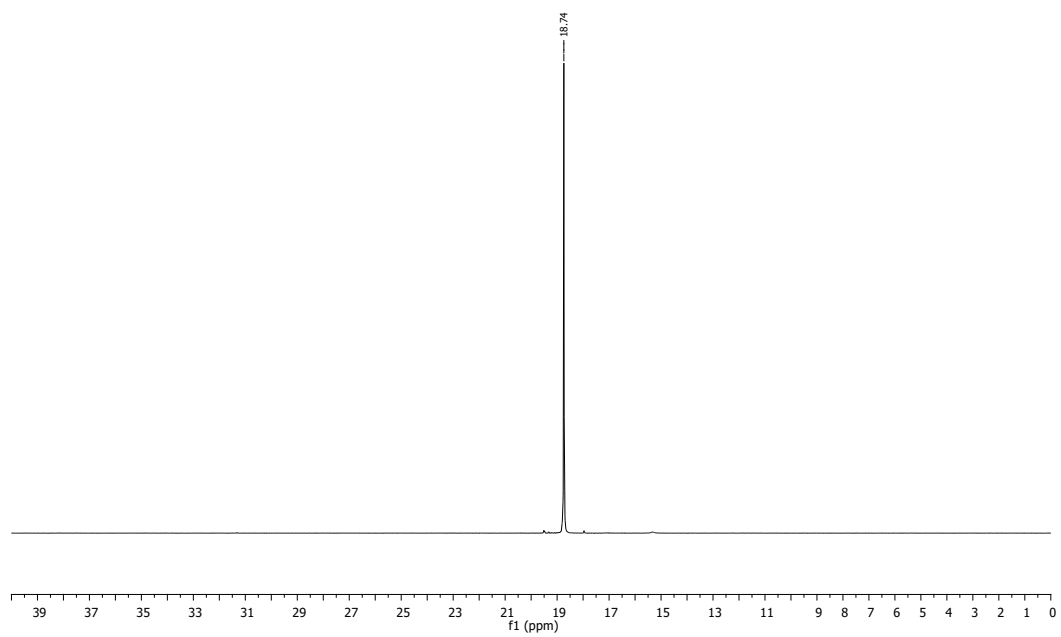

$^{31}\text{P}$  NMR (121 MHz,  $\text{CDCl}_3$ ) of diethyl phenylphosphonate

DEDNPP in EtOH 96% at  $10^{-3}$  kbar (NMR in  $\text{CDCl}_3$ , 300 MHz): Table 1, entry 5

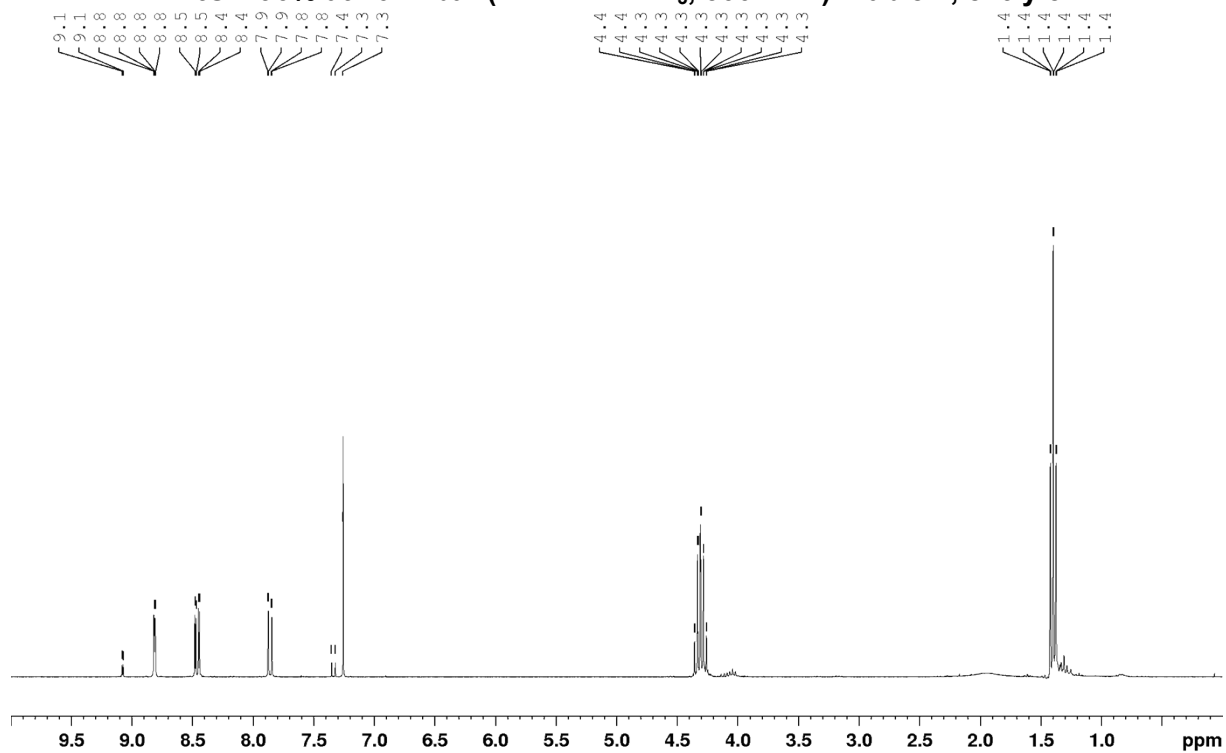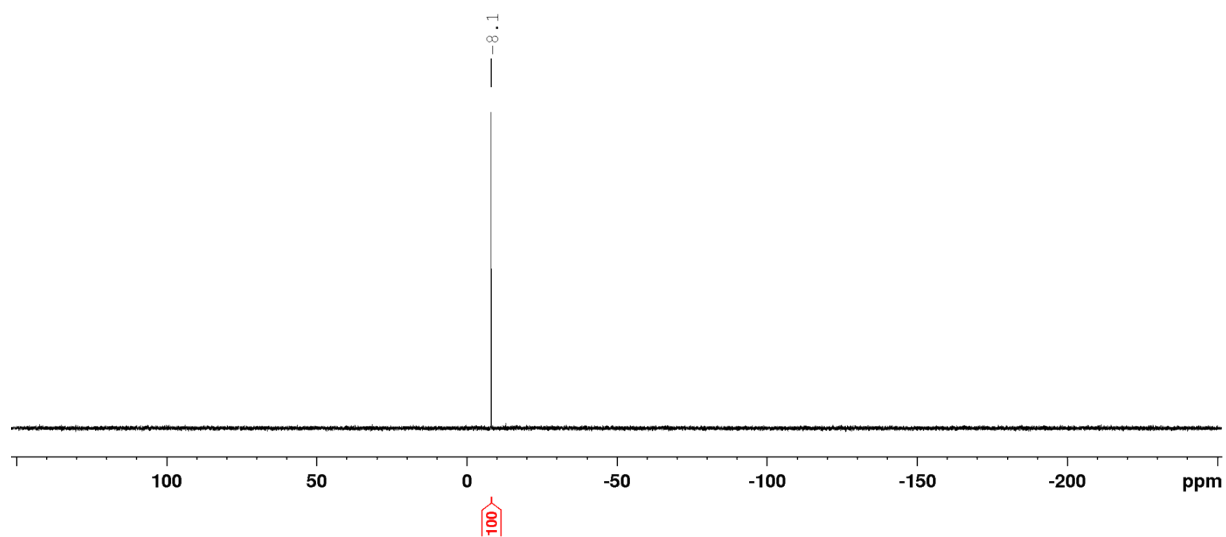

DEDNPP in EtOH 96% at 14 kbar (NMR in CDCl<sub>3</sub>, 300 MHz): Table 1, entry 6

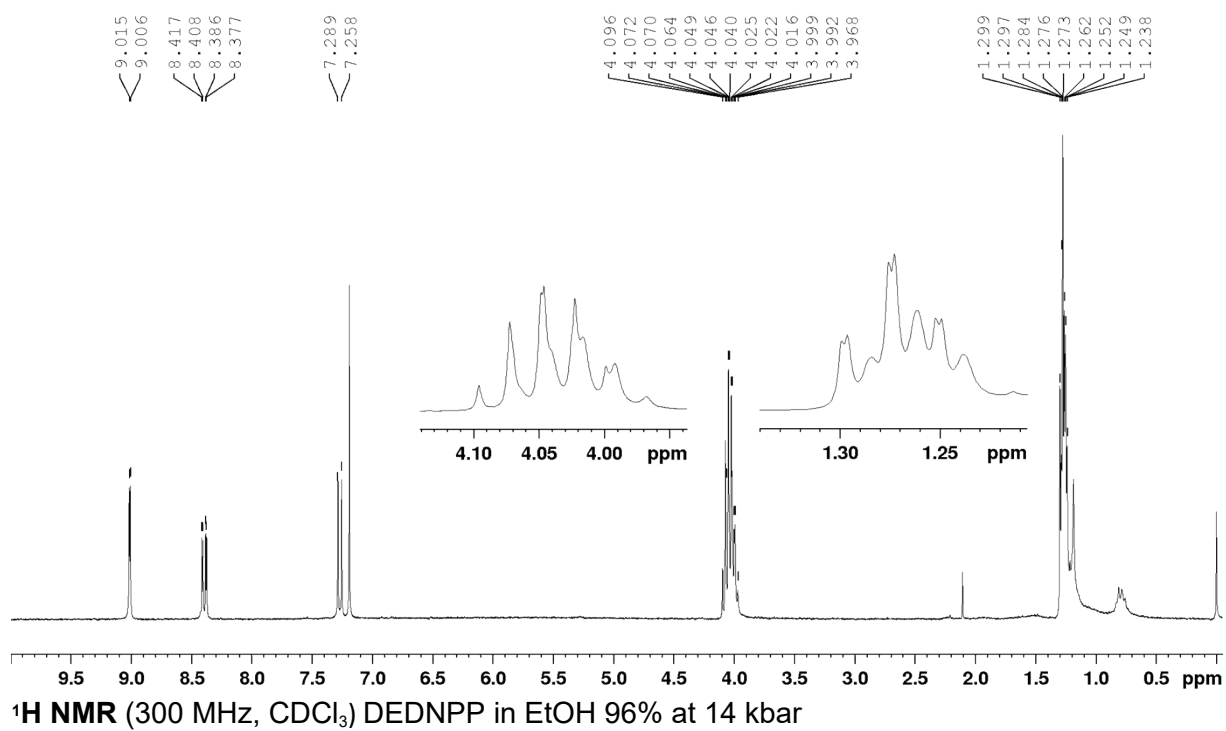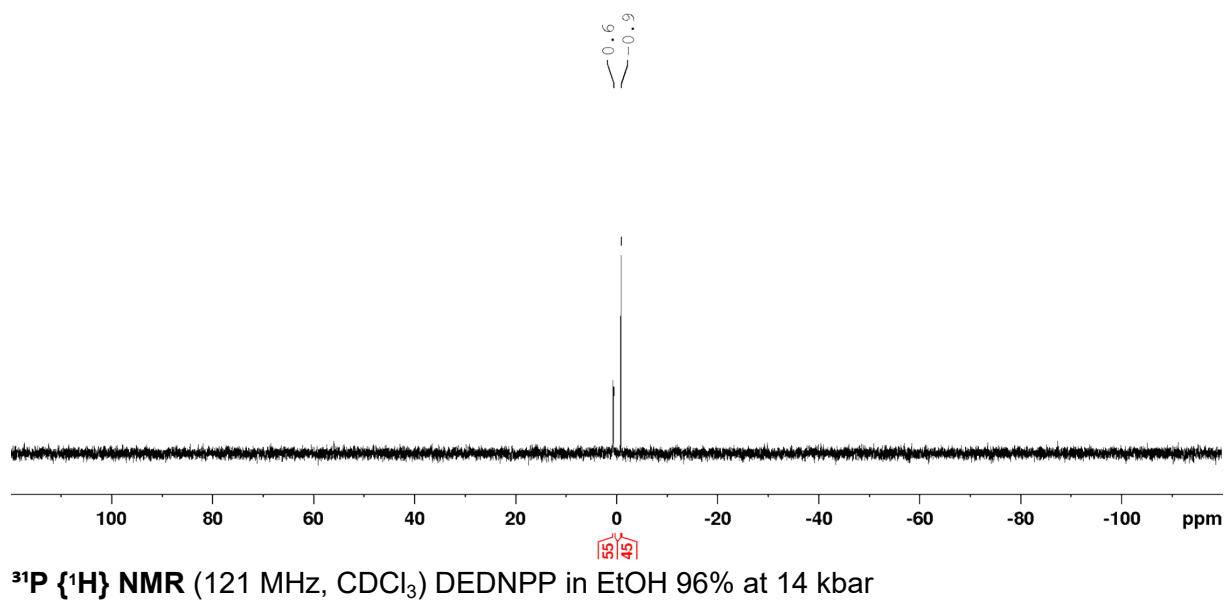

DEDNPP in MeCN/H<sub>2</sub>O (99:1) at 14 kbar (NMR in CDCl<sub>3</sub>, 300 MHz): Table 1, entry 7

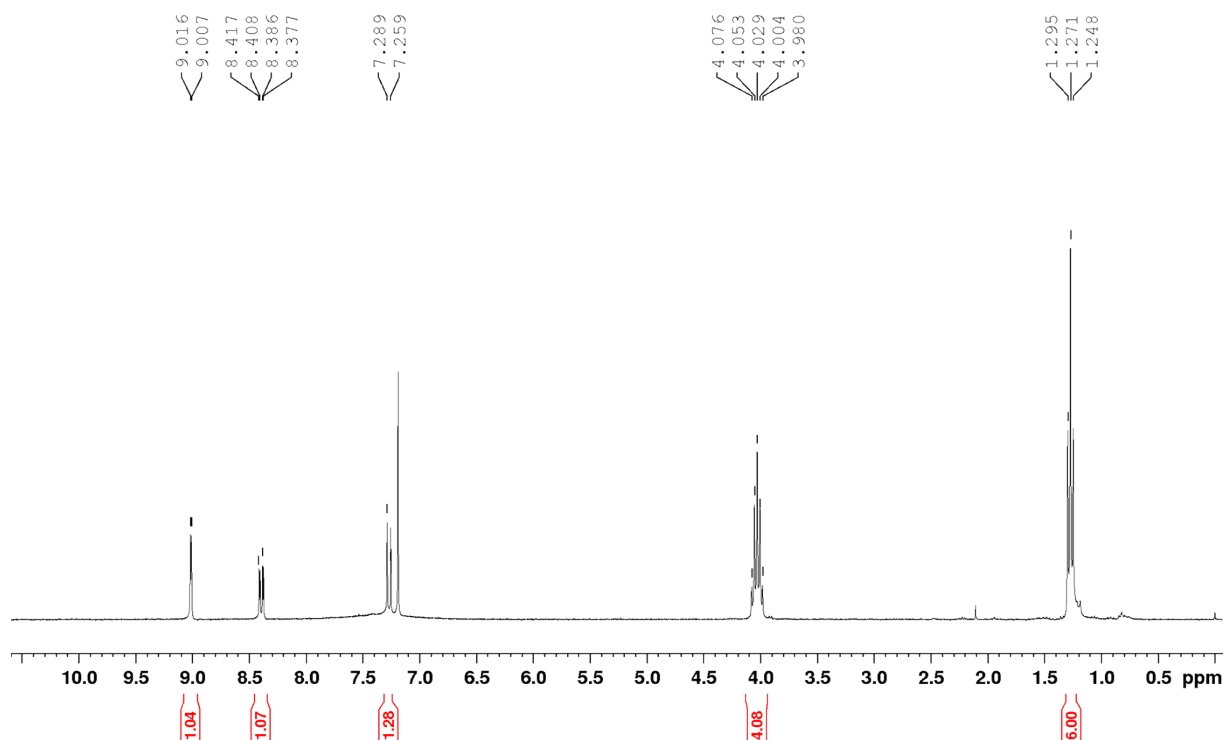

<sup>1</sup>H NMR (300 MHz, CDCl<sub>3</sub>) DEDNPP in MeCN/H<sub>2</sub>O (99:1) at 14 kbar

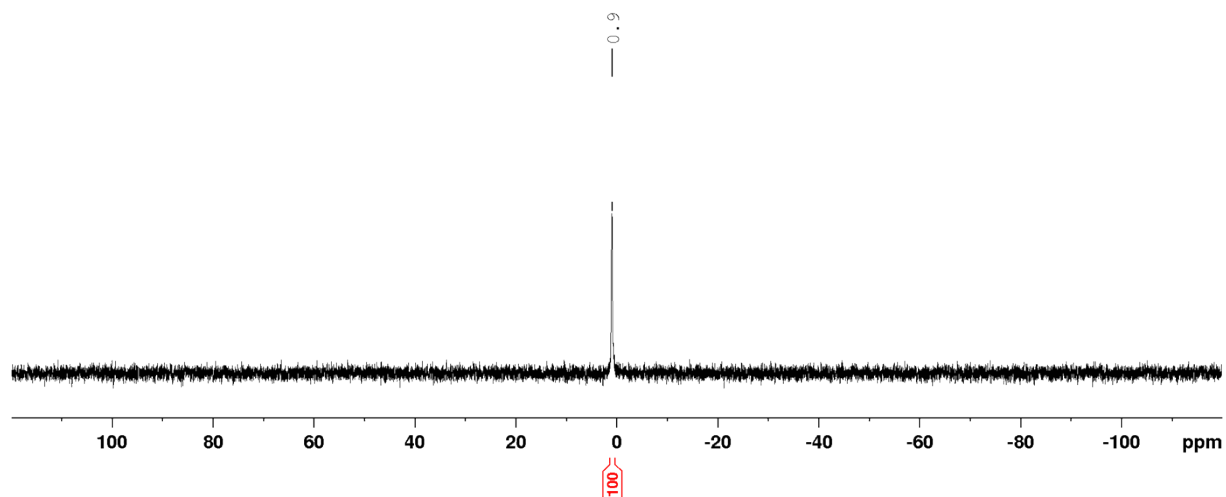

<sup>31</sup>P {<sup>1</sup>H} NMR (121 MHz, CDCl<sub>3</sub>) DEDNPP in MeCN/H<sub>2</sub>O (99:1) at 14 kbar

Paraoxon in MeCN/H<sub>2</sub>O (99:1) at 14 kbar (NMR in CDCl<sub>3</sub>, 300 MHz): Table 1, entry 8

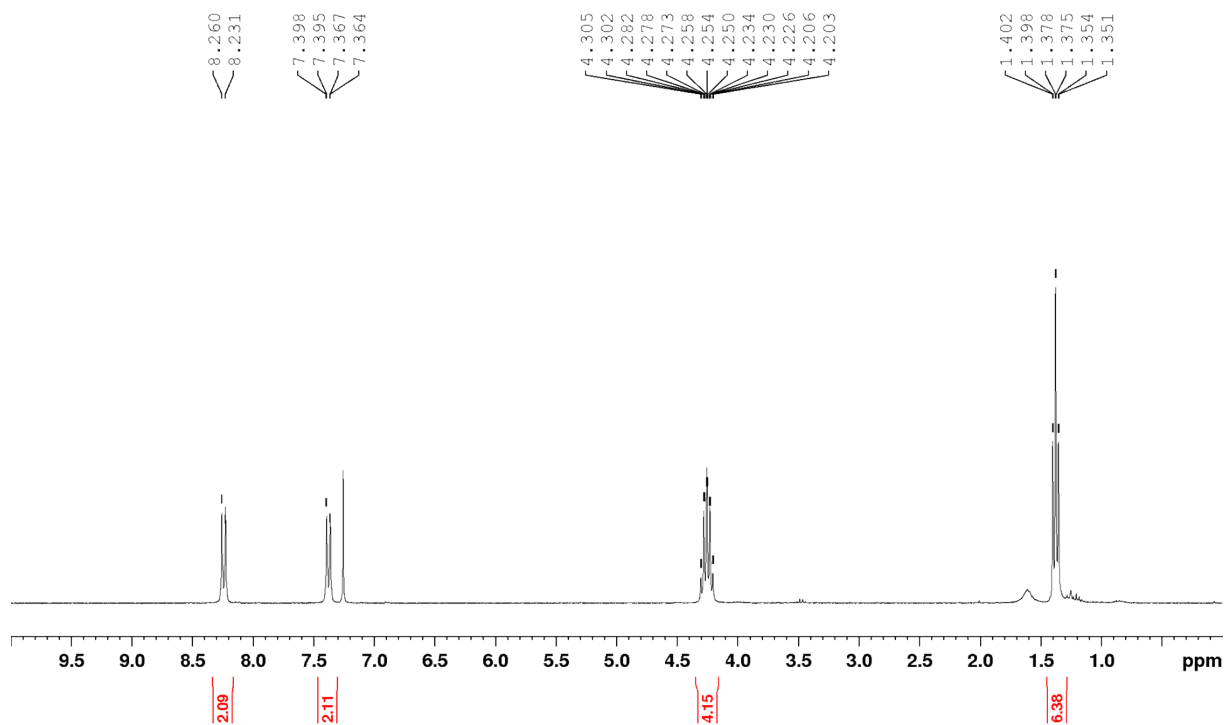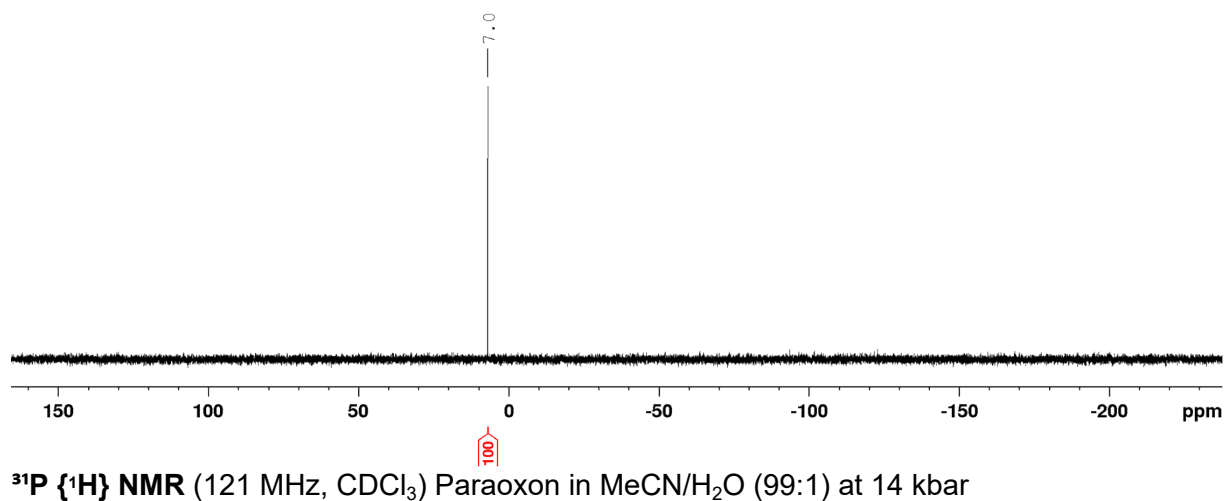

Paraoxon in MeCN/H<sub>2</sub>O (99:1) at 16 kbar (NMR in CDCl<sub>3</sub>, 300 MHz): Table 1, entry 9

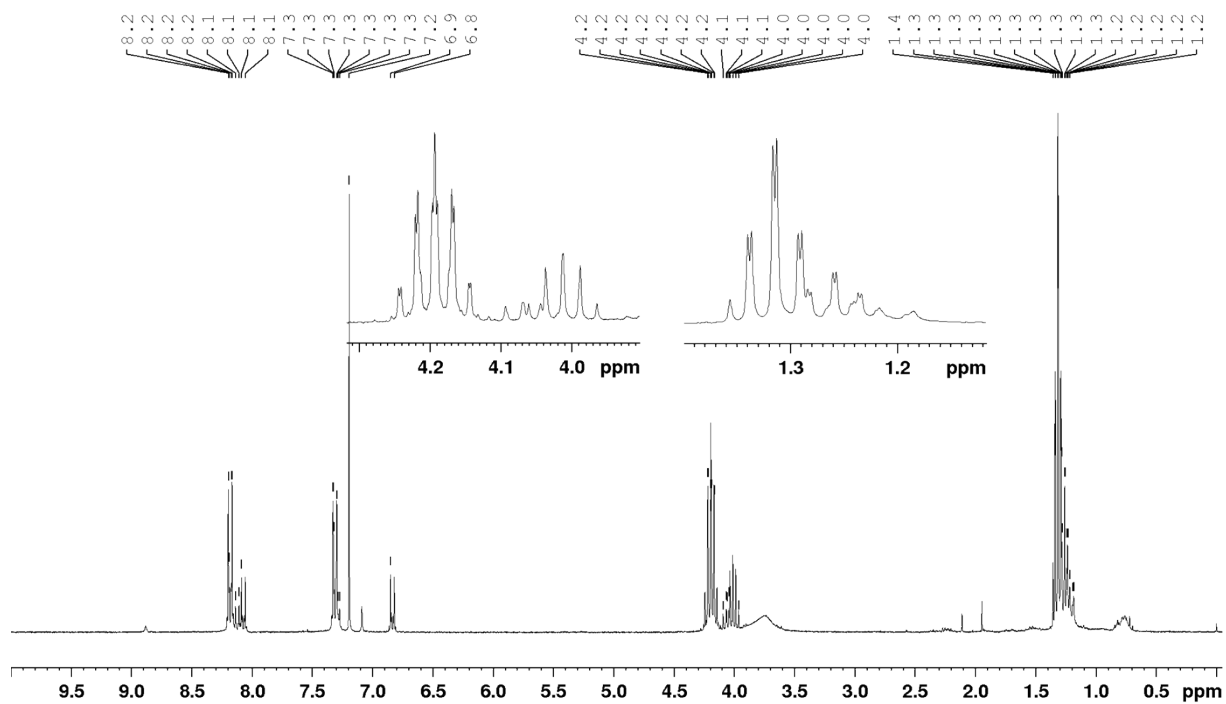

<sup>1</sup>H NMR (300 MHz, CDCl<sub>3</sub>) Paraoxon in MeCN/H<sub>2</sub>O (99:1) at 16 kbar

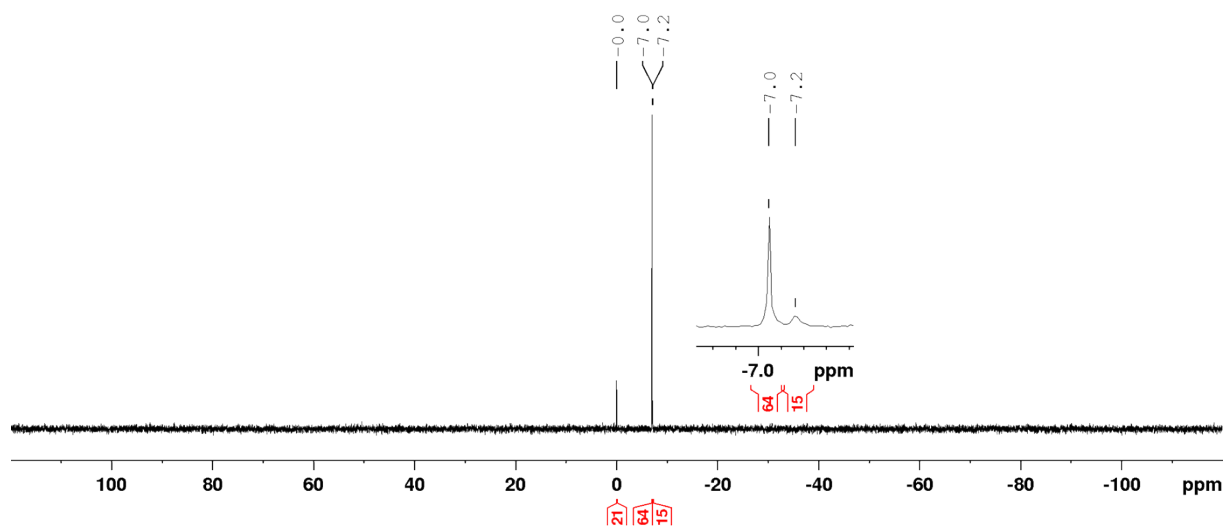

<sup>31</sup>P {<sup>1</sup>H} NMR (121 MHz, CDCl<sub>3</sub>) Paraoxon in MeCN/H<sub>2</sub>O (99:1) at 16 kbar

**Paraoxon in MeCN/H<sub>2</sub>O (99:1) with imidazole at 14 kbar (<sup>1</sup>H and <sup>31</sup>P NMR in D<sub>2</sub>O): Table 2, entry 1**

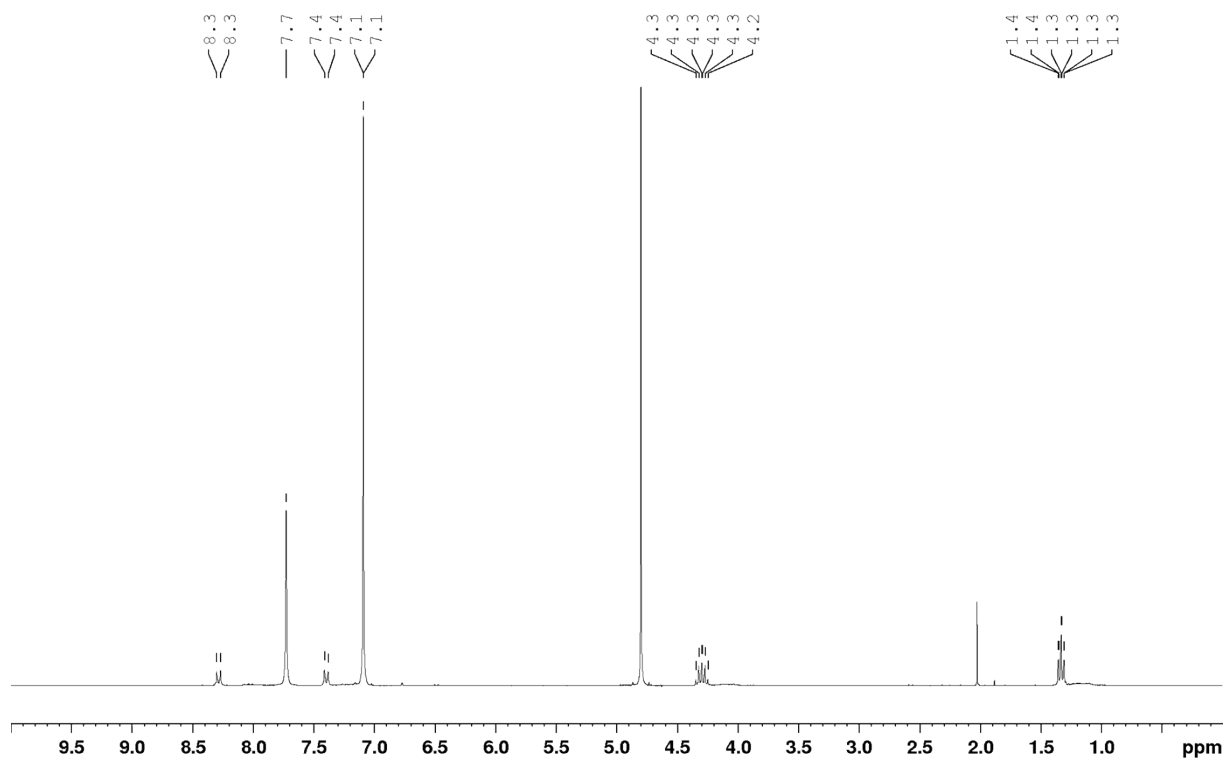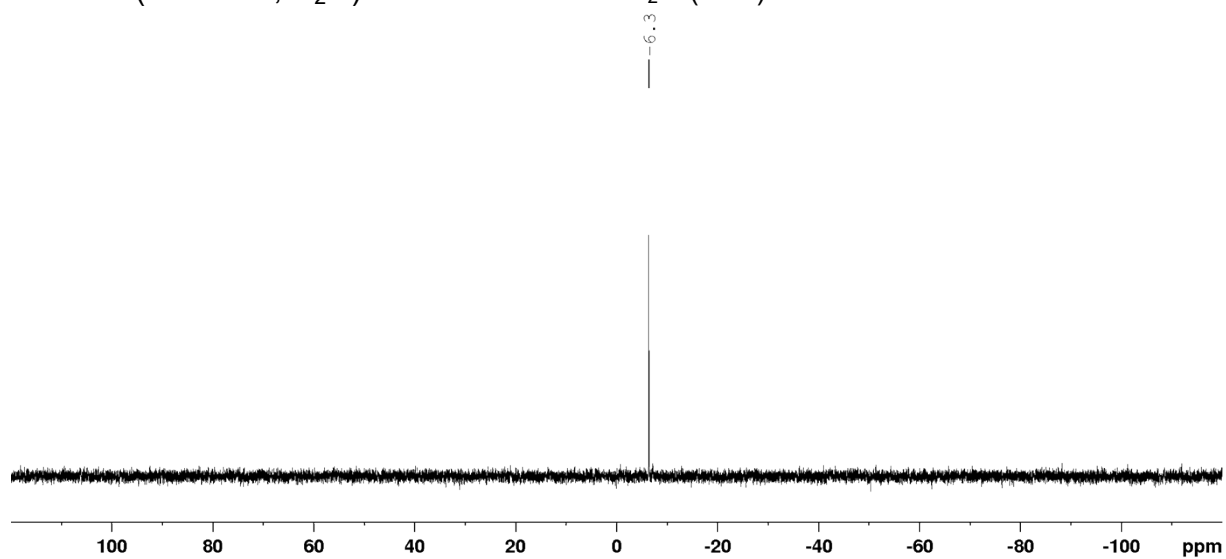



Paraoxon in MeCN/H<sub>2</sub>O (99:1) with imidazole at 14 kbar (<sup>1</sup>H and <sup>31</sup>P NMR in D<sub>2</sub>O): Table 2, entry 2

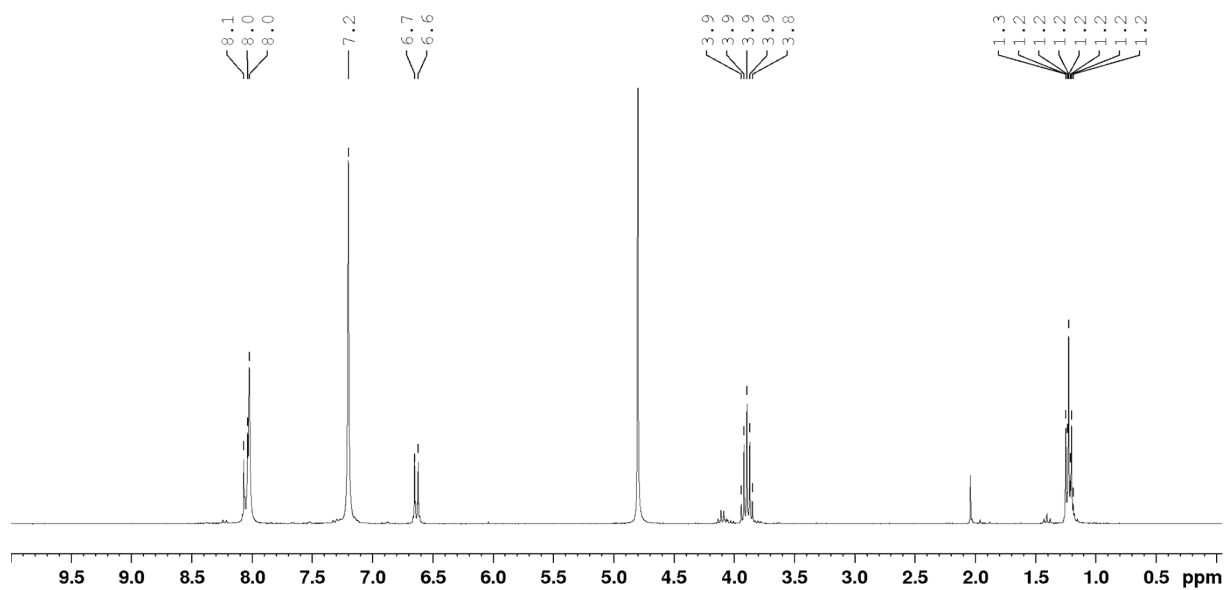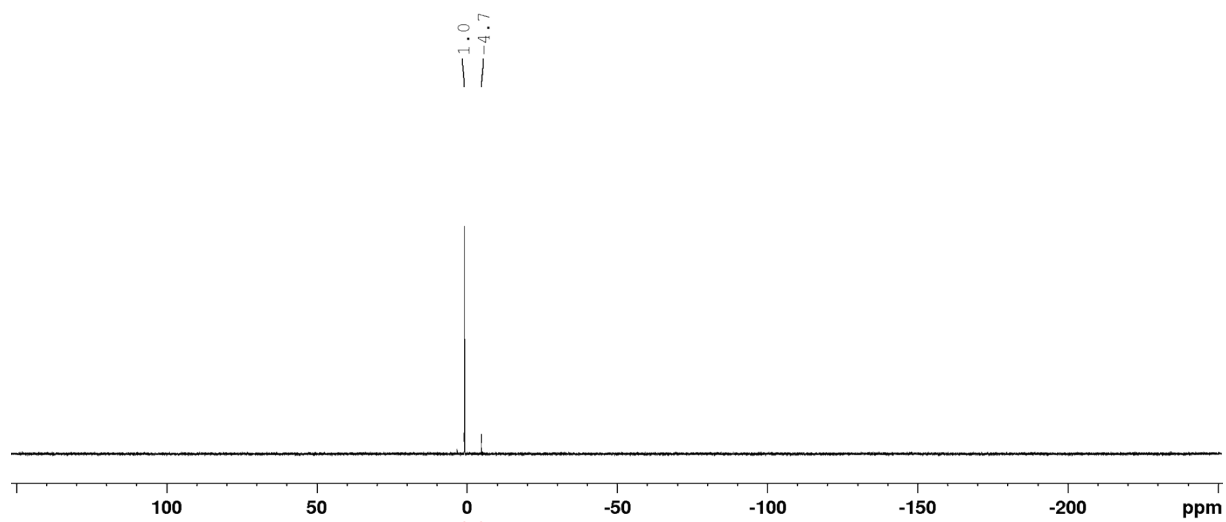

Paraoxon in MeCN/H<sub>2</sub>O (99:1) with imidazole at 16 kbar (<sup>1</sup>H and <sup>31</sup>P NMR in D<sub>2</sub>O): Table 2, entry 3

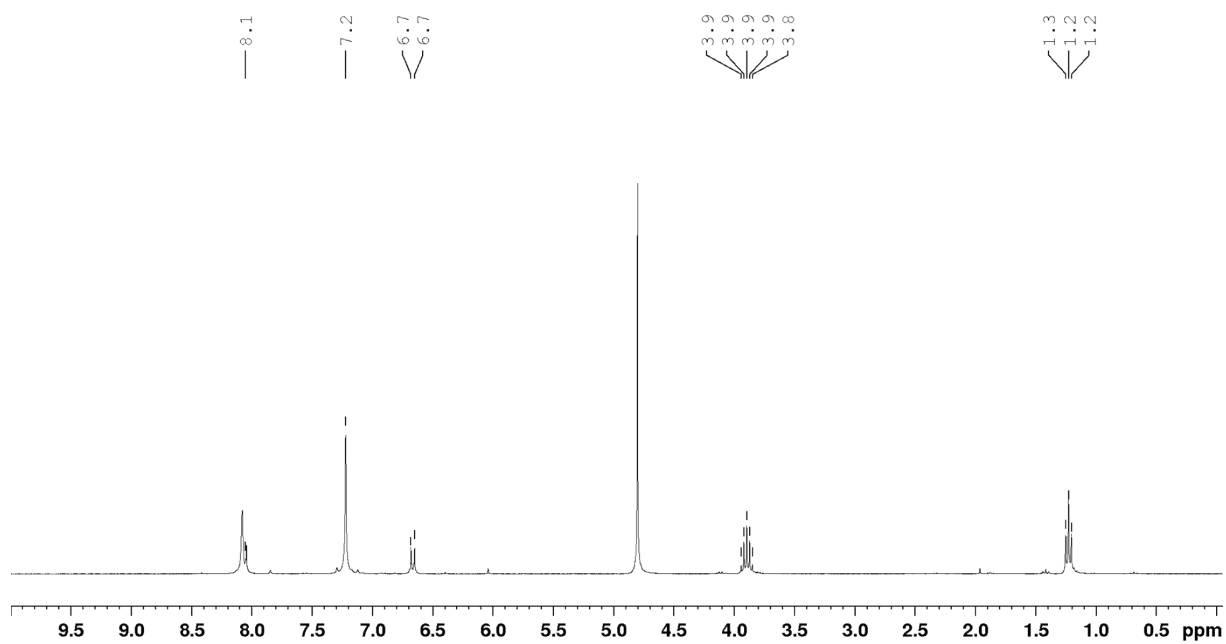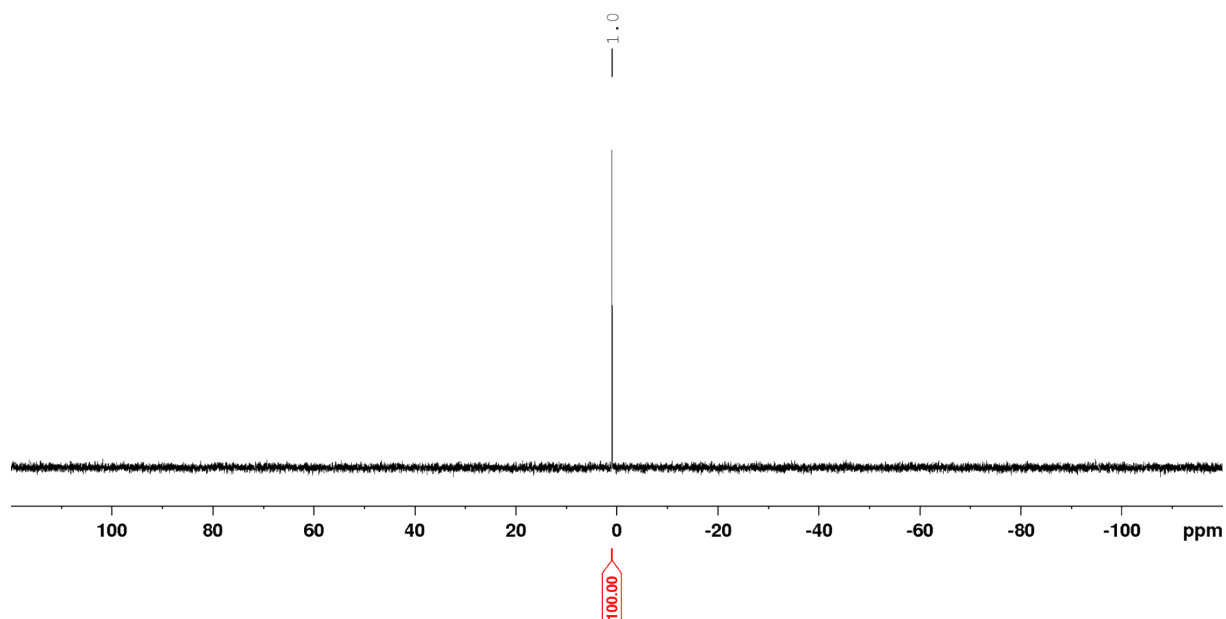

**Methyl Paraoxon in MeCN/H<sub>2</sub>O (99:1) with imidazole at 1 bar (<sup>1</sup>H and <sup>31</sup>P NMR in D<sub>2</sub>O):  
Table 2, entry 4**

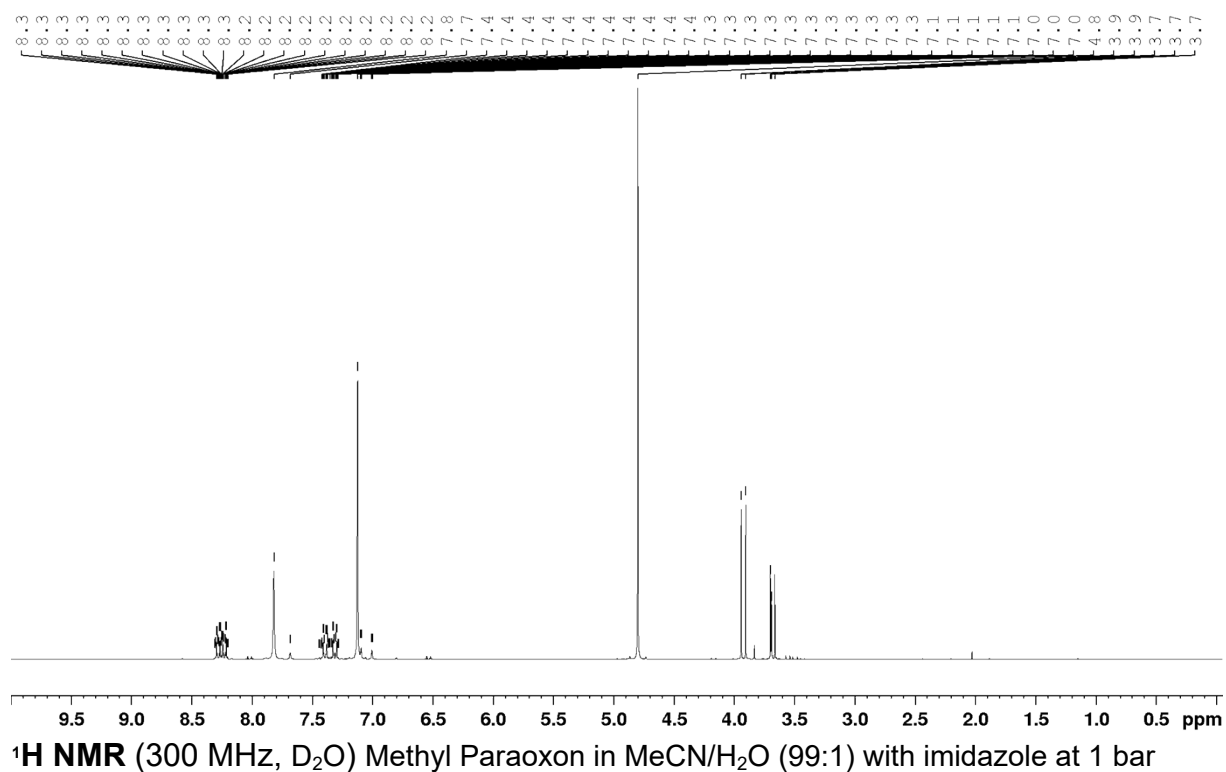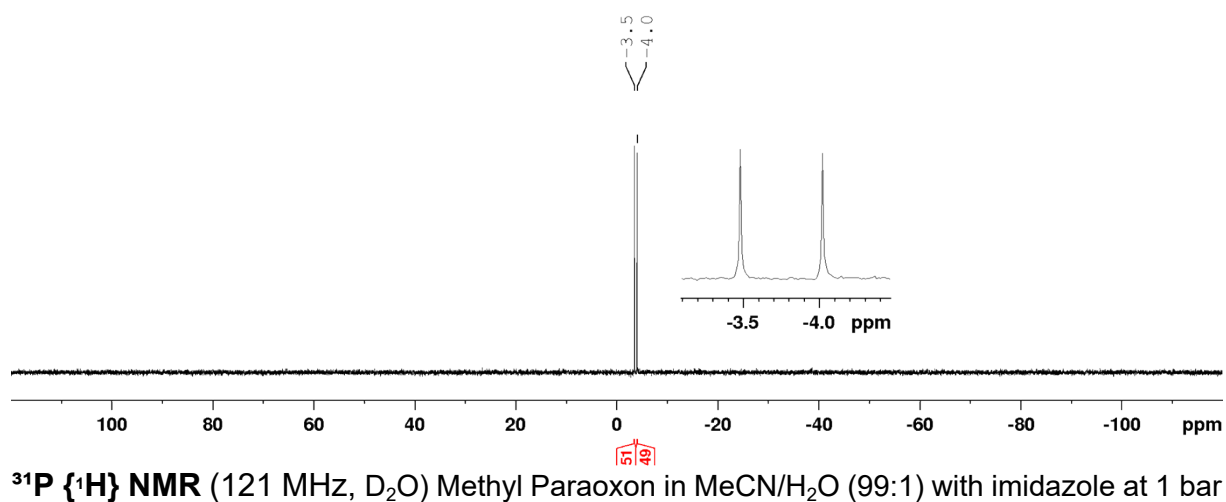

**Methyl Paraoxon in MeCN/H<sub>2</sub>O (99:1) with imidazole at 14 kbar (<sup>1</sup>H and <sup>31</sup>P NMR in D<sub>2</sub>O):  
Table 2, entry 5**

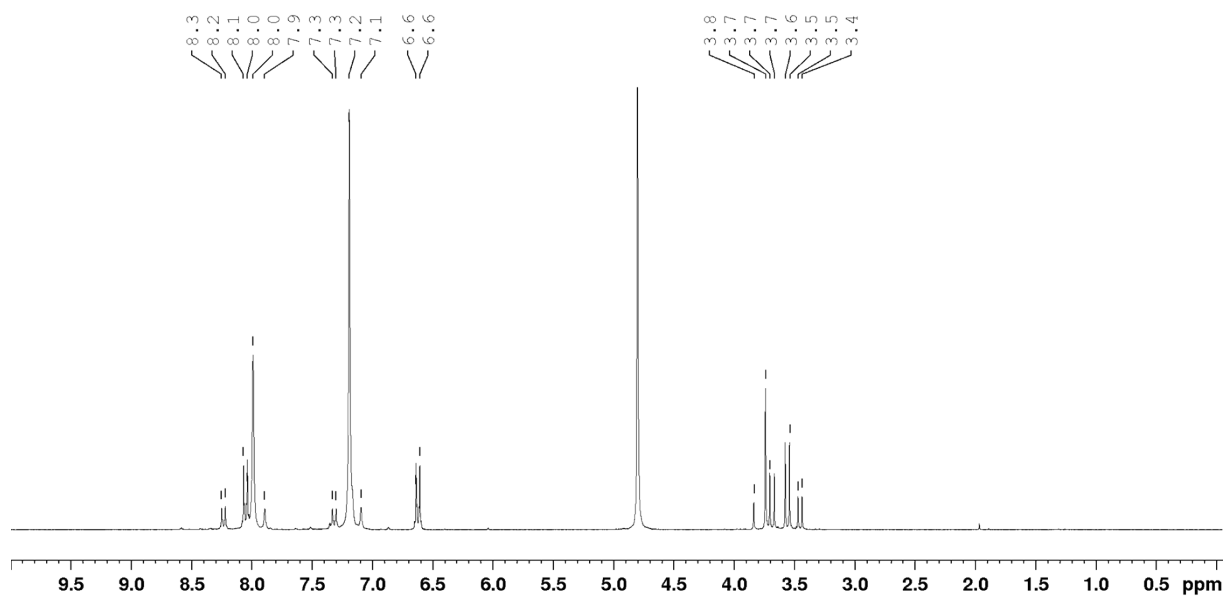

**<sup>1</sup>H NMR (300 MHz, D<sub>2</sub>O) Methyl Paraoxon in MeCN/H<sub>2</sub>O (99:1) with imidazole at 14 kbar**

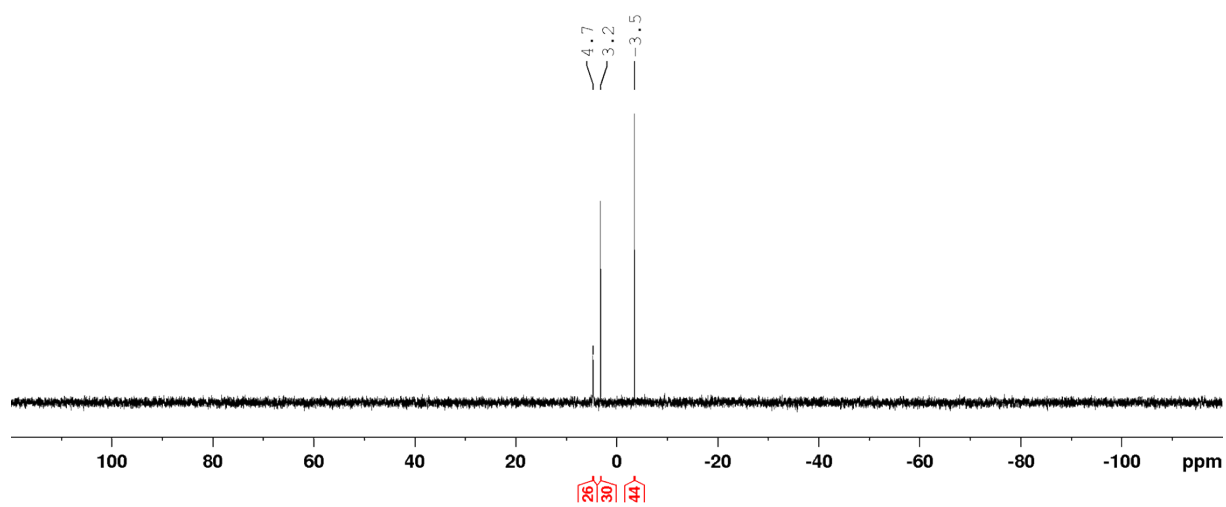

**<sup>31</sup>P {<sup>1</sup>H} NMR (121 MHz, D<sub>2</sub>O) Methyl Paraoxon in MeCN/H<sub>2</sub>O (99:1) with imidazole at 14 kbar**

**Methyl Paraoxon in MeCN/H<sub>2</sub>O (99:1) with imidazole at 16 kbar (<sup>1</sup>H and <sup>31</sup>P NMR in D<sub>2</sub>O):  
Table 2, entry 6**

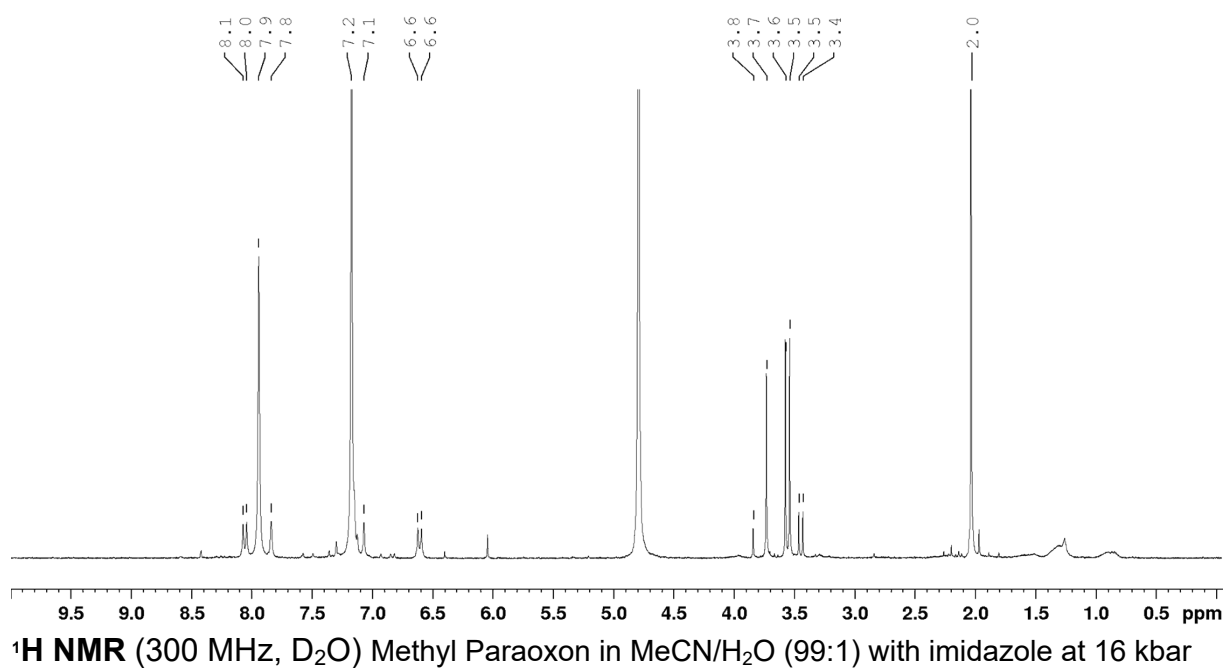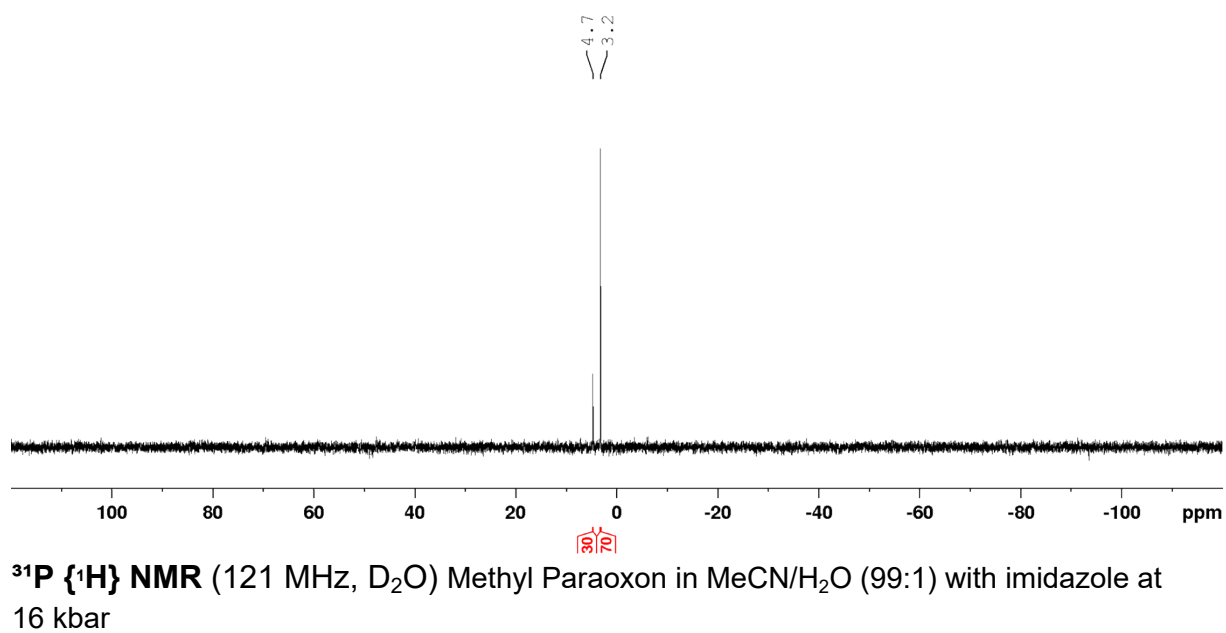

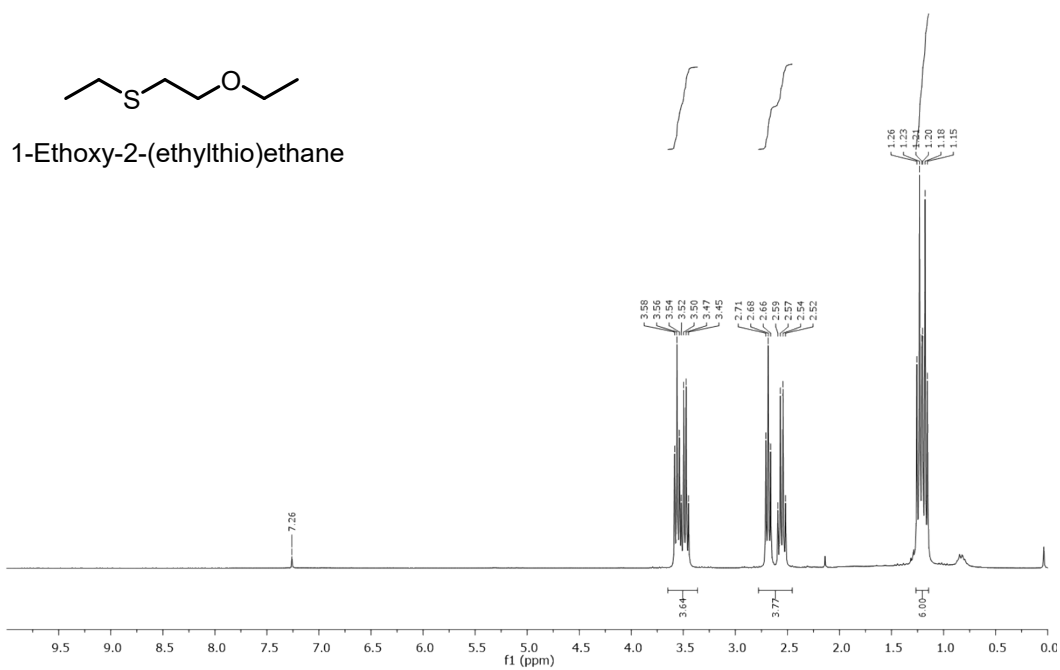

$^1\text{H}$  NMR (300 MHz,  $\text{CDCl}_3$ ) of 1-ethoxy-2-(ethylthio)ethane

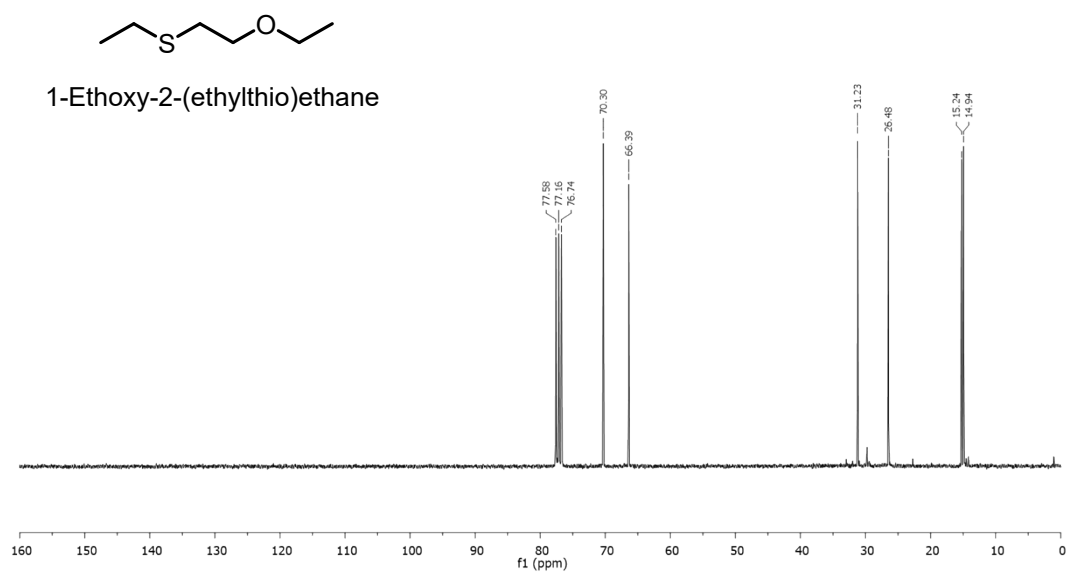

$^{13}\text{C}$   $\{^1\text{H}\}$  NMR (75 MHz,  $\text{CDCl}_3$ ) of 1-ethoxy-2-(ethylthio)ethane

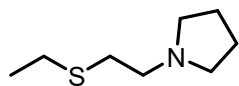

1-[2-(Ethylthio)ethyl]-pyrrolidine

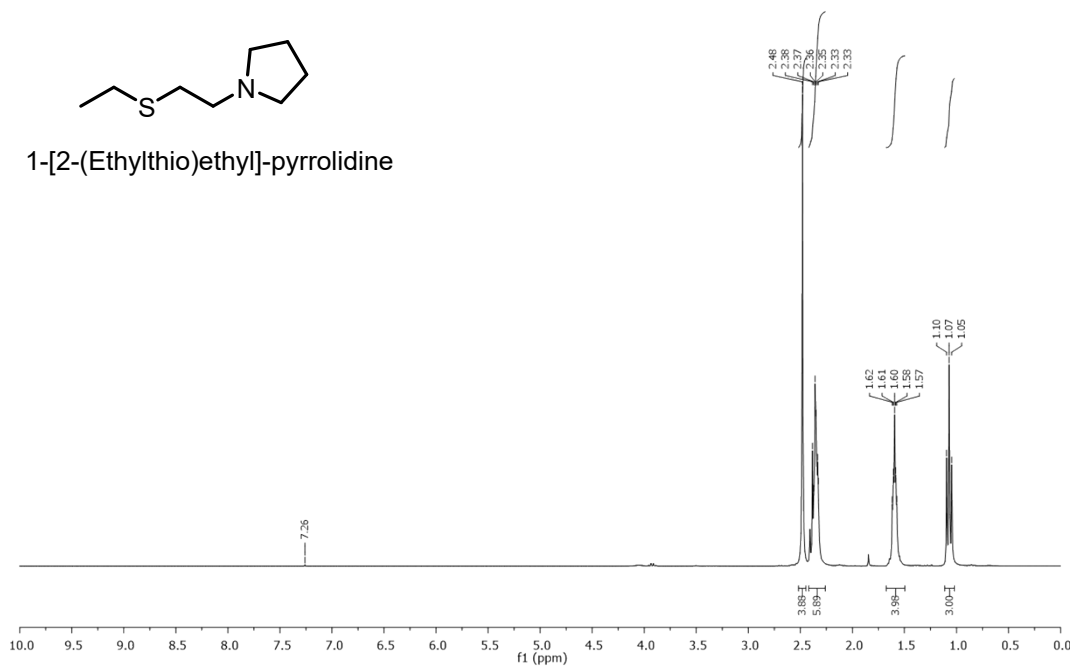

$^1\text{H}$  NMR (300 MHz,  $\text{CDCl}_3$ ) of 1-[2-(ethylthio)ethyl]-pyrrolidine

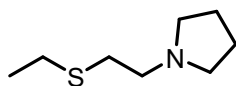

1-[2-(Ethylthio)ethyl]-pyrrolidine

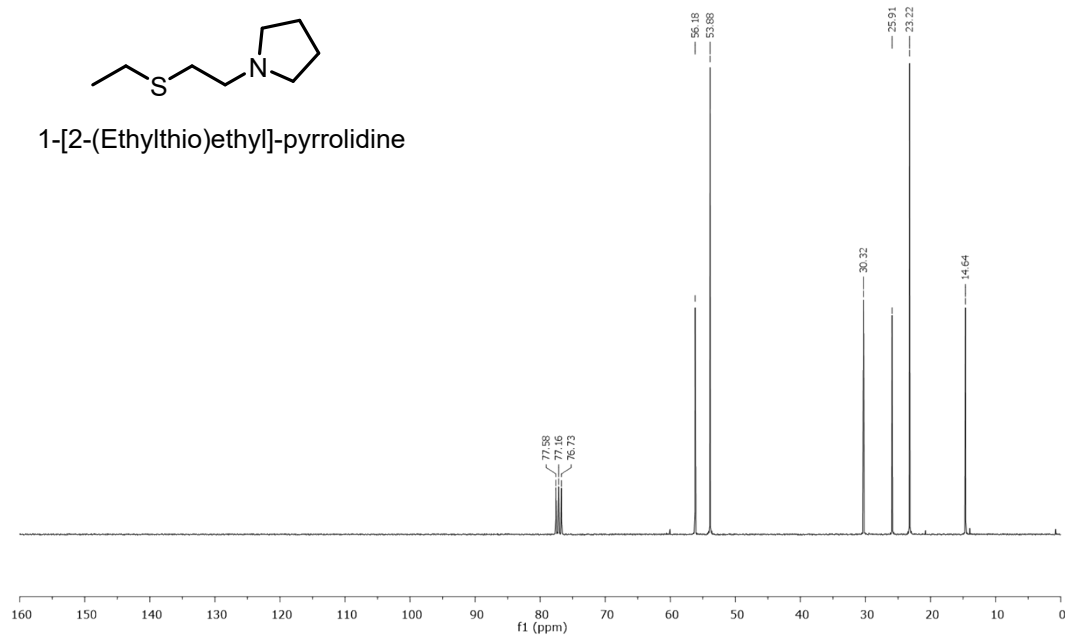

$^{13}\text{C}$   $\{^1\text{H}\}$  NMR (75 MHz,  $\text{CDCl}_3$ ) of 1-[2-(ethylthio)ethyl]-pyrrolidine

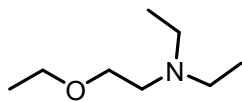

2-Ethoxy-N,N-diethylethanamine

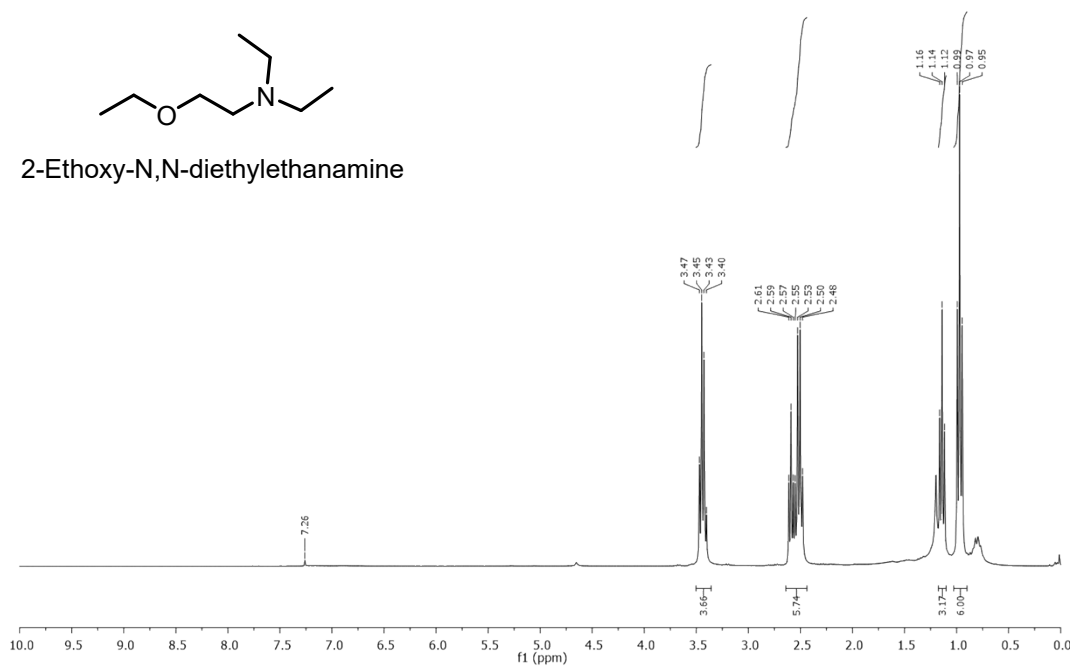

<sup>1</sup>H NMR (300 MHz, CDCl<sub>3</sub>) of 2-ethoxy-N,N-diethylethanamine

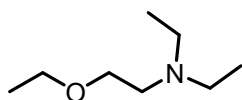

2-Ethoxy-N,N-diethylethanamine

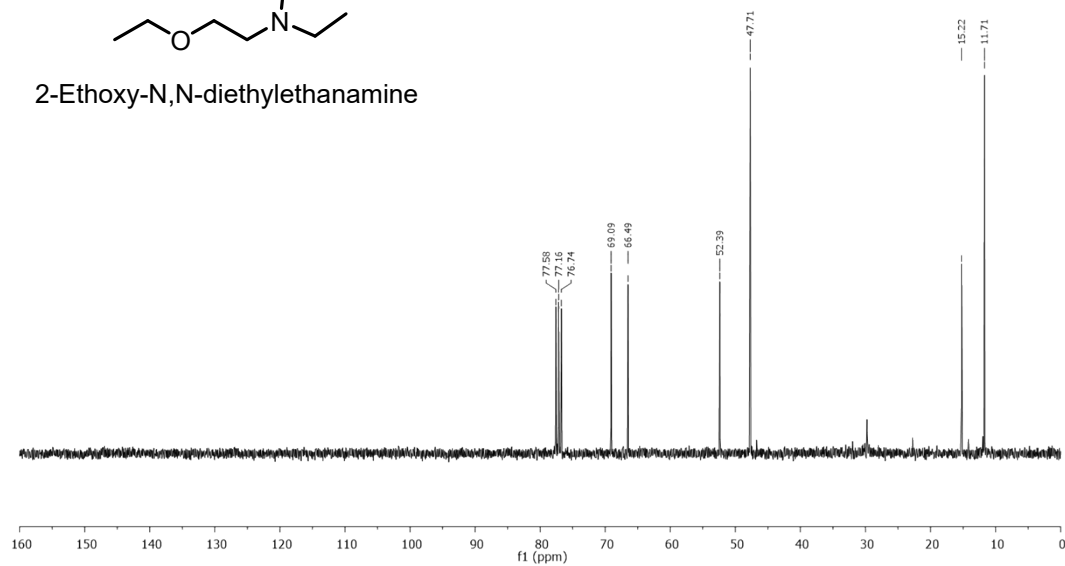

<sup>13</sup>C {<sup>1</sup>H} NMR (75 MHz, CDCl<sub>3</sub>) of 2-ethoxy-N,N-diethylethanamine



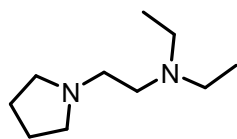

N,N-Diethyl-1-pyrrolidineethanamine

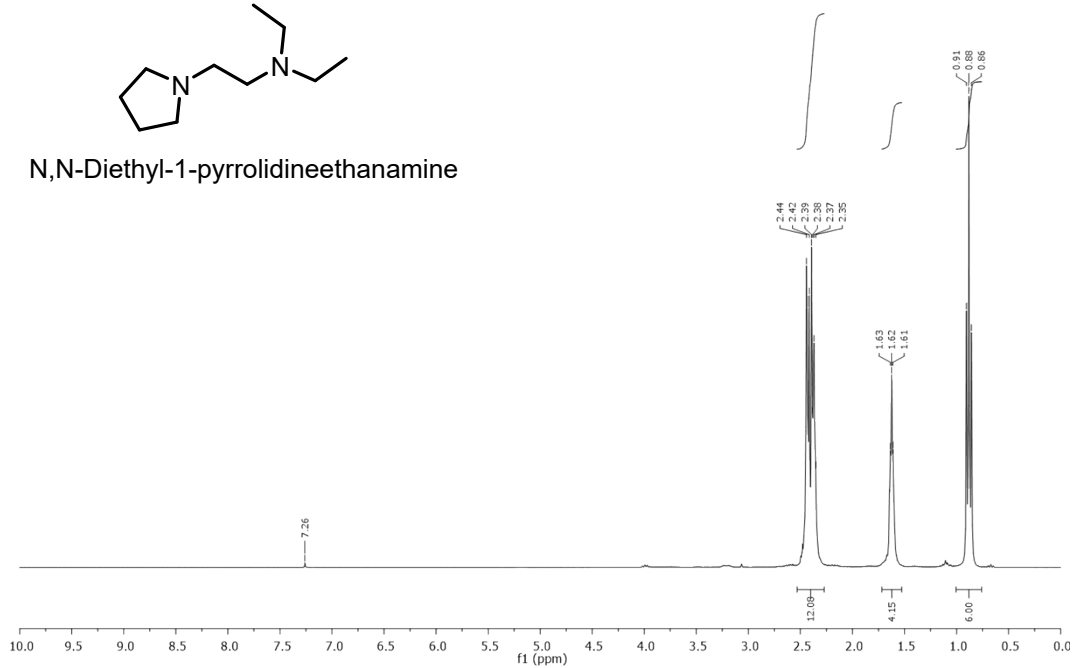

<sup>1</sup>H NMR (300 MHz, CDCl<sub>3</sub>) of N,N-Diethyl-1-pyrrolidine ethanamine

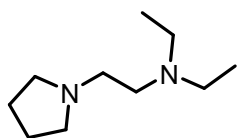

N,N-Diethyl-1-pyrrolidineethanamine

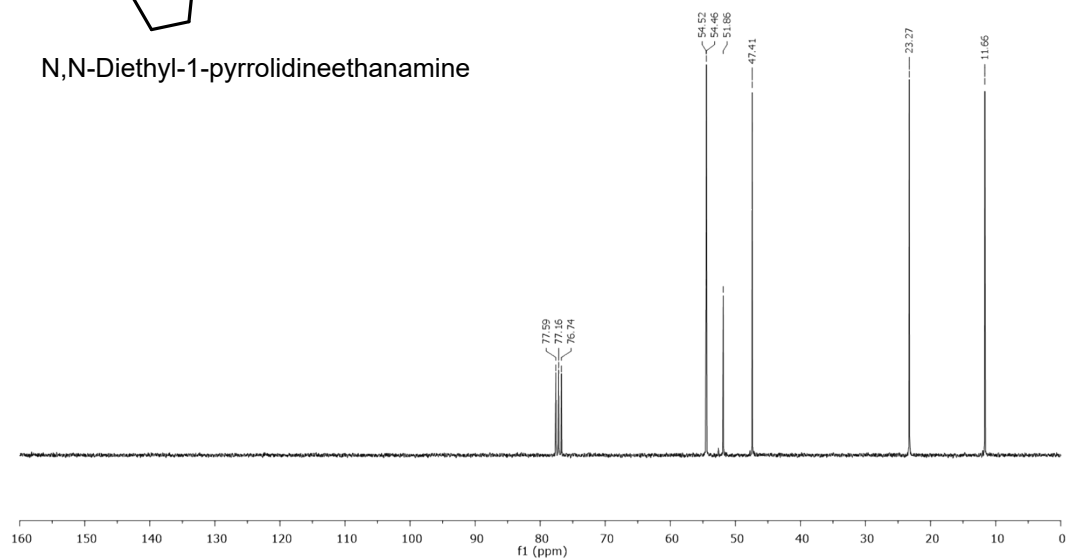

<sup>13</sup>C {<sup>1</sup>H} NMR (75 MHz, CDCl<sub>3</sub>) of N,N-Diethyl-1-pyrrolidine ethanamine

## GC-MS results

Results table

| Entry | Substrate | Scavenger   | P (kbar)          | Temp. (°C) | Time (h) | Conv. (%) |
|-------|-----------|-------------|-------------------|------------|----------|-----------|
| 1     | CEES      | Ethanol     | $1 \cdot 10^{-3}$ | 20 °C      | 24       | 0         |
| 2     | CEES      | Ethanol     | $1 \cdot 10^{-3}$ | 50 °C      | 24       | 69        |
| 3     | CEES      | Ethanol     | 14                |            | 24       | 32        |
| 4     | CEES      | Ethanol     | 16                |            | 24       | 14        |
| 5     | CTEA      | Ethanol*    | 4                 |            | 24       | 0         |
| 6     | CTEA      | Ethanol*    | 16                |            | 24       | 0         |
| 7     | CEES      | EtOLi       | 1                 | 20 °C      | 24       | 37        |
| 8     | CEES      | EtOLi       | 14                |            | 24       | 100       |
| 9     | CTEA      | EtOLi       | 14                |            | 24       | 100       |
| 10    | CEES      | Pyrrolidine | $1 \cdot 10^{-3}$ | 20 °C      | 24       | 15        |
| 11    | CEES      | Pyrrolidine | 14                |            | 24       | 100       |
| 12    | CTEA      | Pyrrolidine | 14                |            | 24       | 100       |

The results are obtained by low resolution GC-MS (Shimadzu QP2010 hybrid ionization apparatus (HP5- MS stationary phase,  $l = 30$  cm,  $d = 0.25$  mm, film thickness =  $0.25 \mu\text{m}$ ) following the method A (Starting temperature is set at  $50$  °C, hold for 2 min then the temperature is increased by  $20$  °C/min to reach  $250$  °C and hold for 5 min). The ethyl vinyl sulfide formation was detected following method B (starting temperature is set at  $40$  °C, hold at 5 min, then increasing by  $15$  °C/min to reach  $150$  °C and hold for 2 min. The latest analysis was performed by low resolution GC-MS (Thermo scientific, TRACE 1310 gas chromatography and ISQ 7000 single Quadrupole Mass spectrometer) (HP5- MS stationary phase,  $l = 30$  cm,  $d = 0.25$  mm, film thickness =  $0.25 \mu\text{m}$ ).

| Compounds                     | Retention times (min) |          |
|-------------------------------|-----------------------|----------|
|                               | Method A              | Method B |
| Decane                        | 5.08                  | 9.842    |
| <chem>CCCCSCCCCl</chem>       | 4.348                 | 8.712    |
| <chem>CCCCSCCCN1CCCC1</chem>  | 7.303                 |          |
| <chem>CCCCSCCCOCC</chem>      | 4.947                 | 9.586    |
| <chem>CCCCSCC=C</chem>        |                       | 3.179    |
| <chem>CCN(CC)CCCl</chem>      | 4.179                 |          |
| <chem>CCN(CC)CCOCC</chem>     | 4.617                 |          |
| <chem>CCN(CC)CCN1CCCC1</chem> | 6.896                 |          |

### Entry 1 (method A)

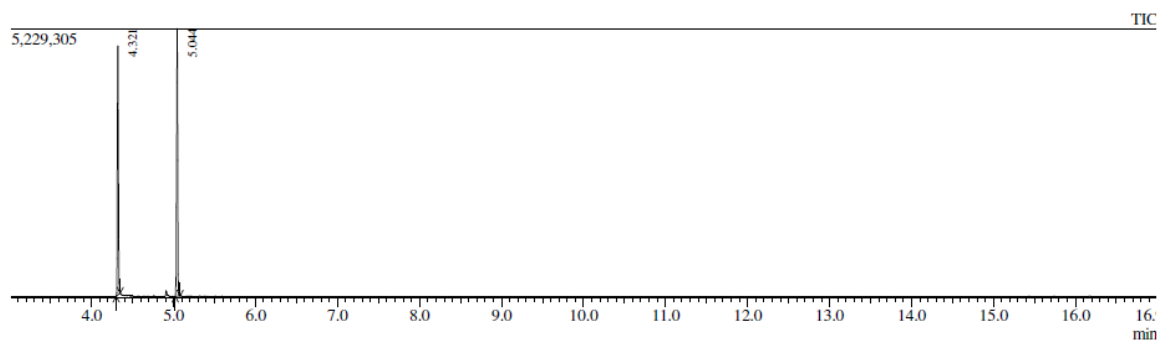

| Peak Report TIC |        |        |        |         |        |          |         |      |      |      |
|-----------------|--------|--------|--------|---------|--------|----------|---------|------|------|------|
| Peak#           | R.Time | I.Time | F.Time | Area    | Area%  | Height   | Height% | A/H  | Mark | Name |
| 1               | 4.321  | 4.300  | 4.350  | 4090182 | 48.20  | 4846974  | 48.22   | 0.84 | MI   |      |
| 2               | 5.044  | 5.020  | 5.080  | 4396281 | 51.80  | 5204523  | 51.78   | 0.84 | MI   |      |
|                 |        |        |        | 8486463 | 100.00 | 10051497 | 100.00  |      |      |      |

## Entry 2 (method A)

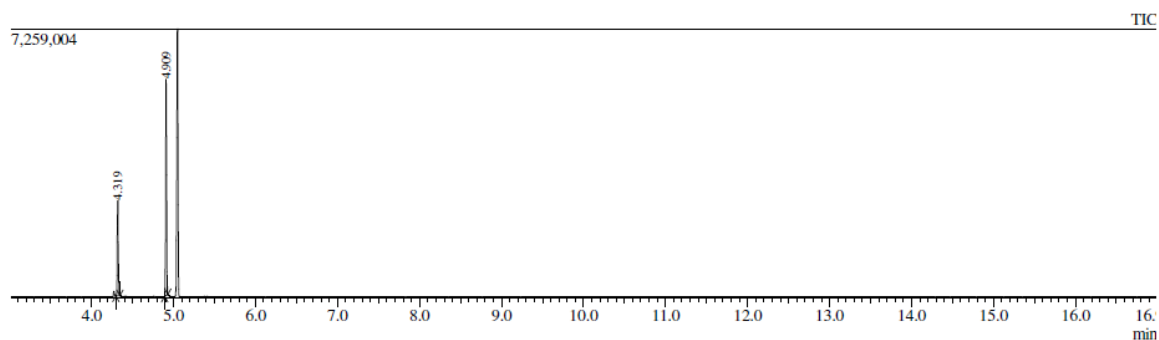

Peak Report TIC

| Peak# | R.Time | I.Time | F.Time | Area    | Area%  | Height  | Height% | A/H  | Mark | Name |
|-------|--------|--------|--------|---------|--------|---------|---------|------|------|------|
| 1     | 4.319  | 4.295  | 4.345  | 2126612 | 30.89  | 2567739 | 30.54   | 0.83 | MI   |      |
| 2     | 4.909  | 4.890  | 4.930  | 4757619 | 69.11  | 5841279 | 69.46   | 0.81 | MI   |      |
|       |        |        |        | 6884231 | 100.00 | 8409018 | 100.00  |      |      |      |

## Entry 3 (method A)

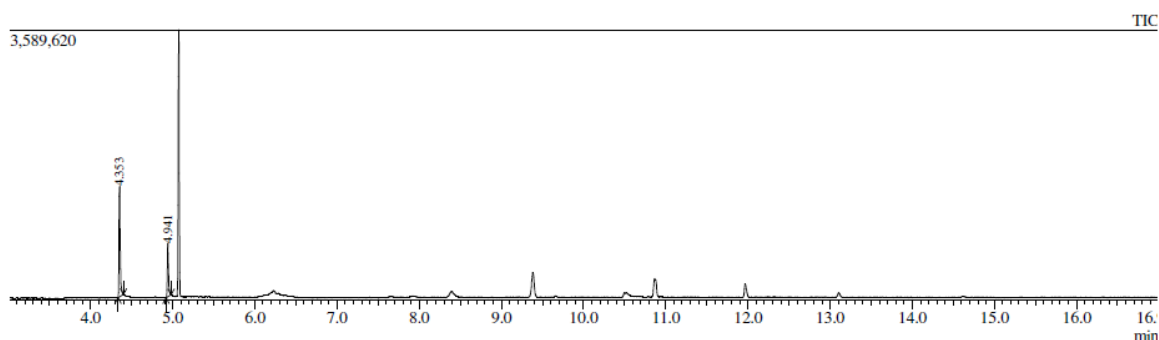

Peak Report TIC

| Peak# | R.Time | I.Time | F.Time | Area    | Area%  | Height  | Height% | A/H  | Mark | Name |
|-------|--------|--------|--------|---------|--------|---------|---------|------|------|------|
| 1     | 4.353  | 4.335  | 4.400  | 1516507 | 68.01  | 1467390 | 67.45   | 1.03 | MI   |      |
| 2     | 4.941  | 4.920  | 4.980  | 713164  | 31.99  | 708021  | 32.55   | 1.01 | MI   |      |
|       |        |        |        | 2229671 | 100.00 | 2175411 | 100.00  |      |      |      |

## Entry 4 (method A)

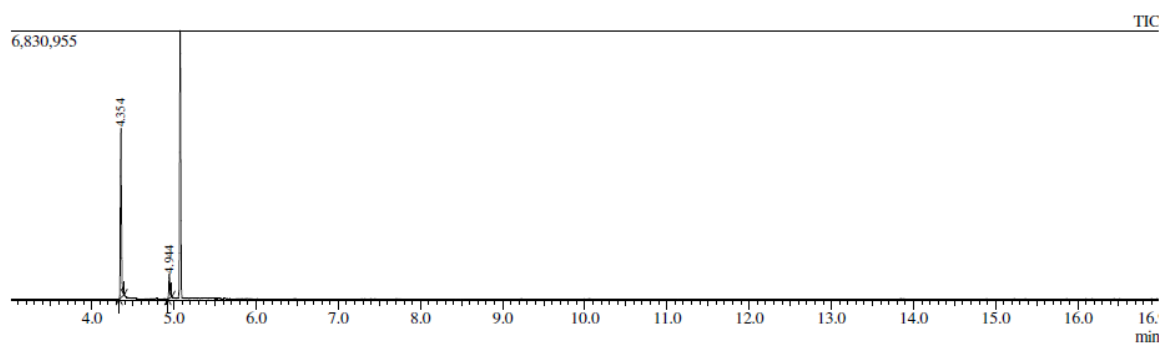

Peak Report TIC

| Peak# | R.Time | I.Time | F.Time | Area    | Area%  | Height  | Height% | A/H  | Mark | Name |
|-------|--------|--------|--------|---------|--------|---------|---------|------|------|------|
| 1     | 4.354  | 4.335  | 4.395  | 3875381 | 86.24  | 4296373 | 87.52   | 0.90 | MI   |      |
| 2     | 4.944  | 4.925  | 4.975  | 618595  | 13.76  | 612608  | 12.48   | 1.01 | MI   |      |
|       |        |        |        | 4493976 | 100.00 | 4908981 | 100.00  |      |      |      |

### Entry 5 (method A)

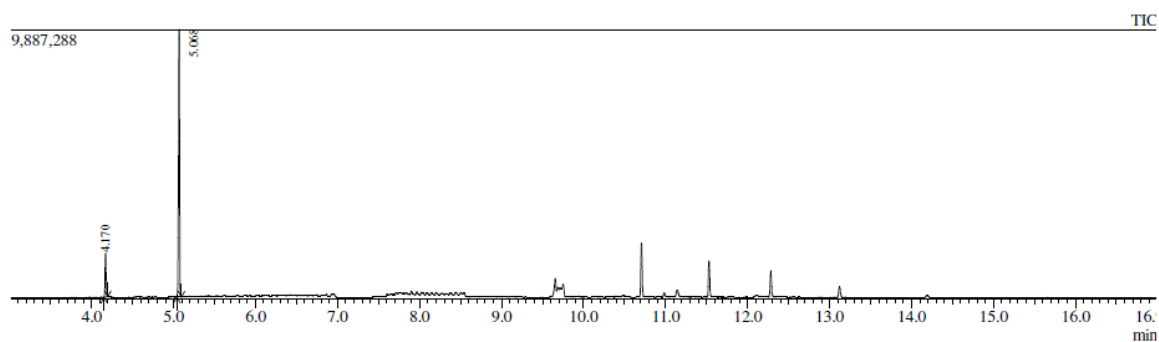

| Peak Report TIC |        |        |        |          |        |          |         |      |      |      |
|-----------------|--------|--------|--------|----------|--------|----------|---------|------|------|------|
| Peak#           | R.Time | I.Time | F.Time | Area     | Area%  | Height   | Height% | A/H  | Mark | Name |
| 1               | 4.170  | 4.155  | 4.200  | 1364174  | 12.70  | 1608141  | 14.06   | 0.85 | MI   |      |
| 2               | 5.068  | 5.040  | 5.095  | 9379236  | 87.30  | 9826906  | 85.94   | 0.95 | MI   |      |
|                 |        |        |        | 10743410 | 100.00 | 11435047 | 100.00  |      |      |      |

### Entry 6 (method A)

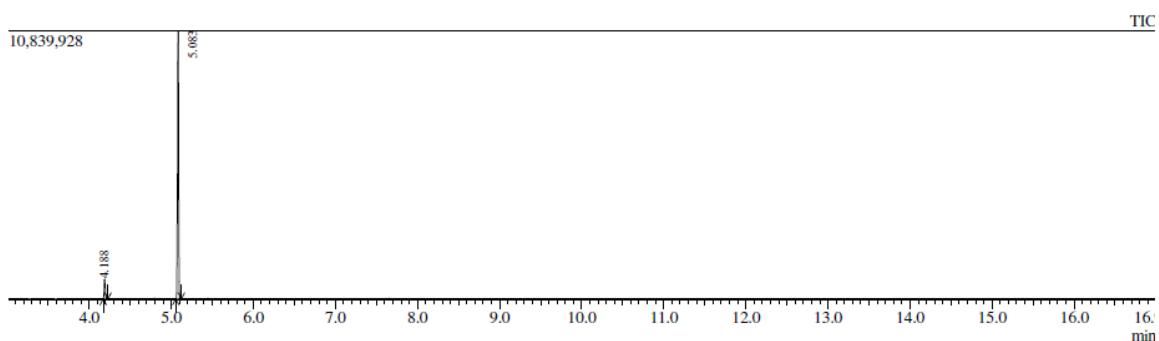

| Peak Report TIC |        |        |        |          |        |          |         |      |      |      |
|-----------------|--------|--------|--------|----------|--------|----------|---------|------|------|------|
| Peak#           | R.Time | I.Time | F.Time | Area     | Area%  | Height   | Height% | A/H  | Mark | Name |
| 1               | 4.188  | 4.170  | 4.230  | 787024   | 7.49   | 784689   | 6.77    | 1.00 | MI   |      |
| 2               | 5.083  | 5.055  | 5.125  | 9724270  | 92.51  | 10813128 | 93.23   | 0.90 | MI   |      |
|                 |        |        |        | 10511294 | 100.00 | 11597817 | 100.00  |      |      |      |

### Entry 7 (methods A and B)

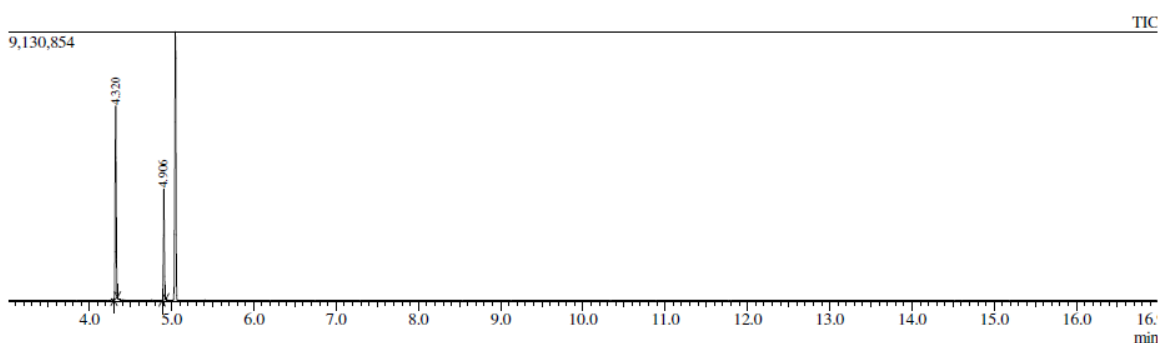

| Peak Report TIC |        |        |        |         |        |          |         |      |      |      |
|-----------------|--------|--------|--------|---------|--------|----------|---------|------|------|------|
| Peak#           | R.Time | I.Time | F.Time | Area    | Area%  | Height   | Height% | A/H  | Mark | Name |
| 1               | 4.320  | 4.300  | 4.340  | 5745742 | 64.97  | 6523729  | 63.46   | 0.88 | MI   |      |
| 2               | 4.906  | 4.885  | 4.930  | 3097914 | 35.03  | 3756181  | 36.54   | 0.82 | MI   |      |
|                 |        |        |        | 8843656 | 100.00 | 10279910 | 100.00  |      |      |      |

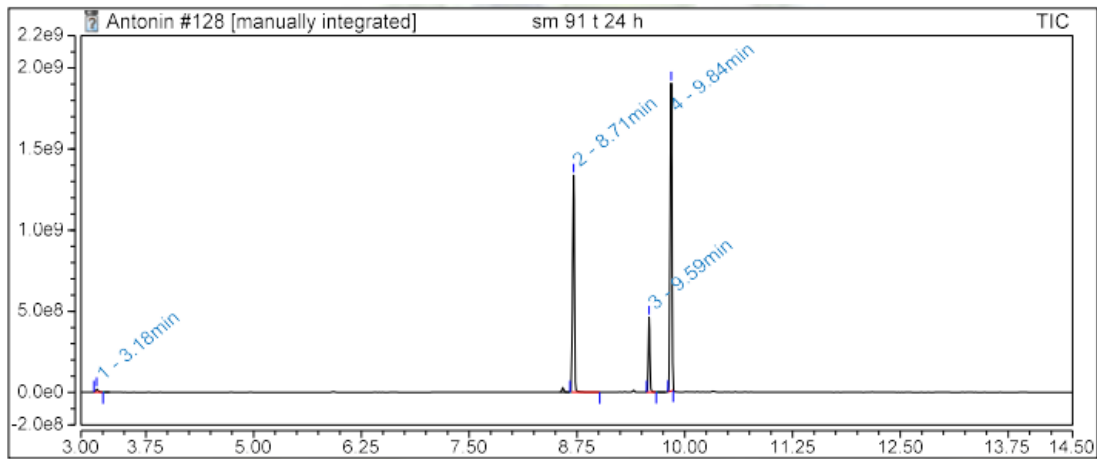

| No.           | Peak Name | Retention Time min | Area counts*min     | Relative Area % |
|---------------|-----------|--------------------|---------------------|-----------------|
| 1             |           | 3.179              | 629065.407          | 0.70            |
| 2             |           | 8.712              | 33686750.636        | 37.28           |
| 3             |           | 9.586              | 9346715.987         | 10.34           |
| 4             |           | 9.842              | 46704276.172        | 51.68           |
| <b>Total:</b> |           |                    | <b>90366808.202</b> | <b>100.00</b>   |

Entry 8 (method A)

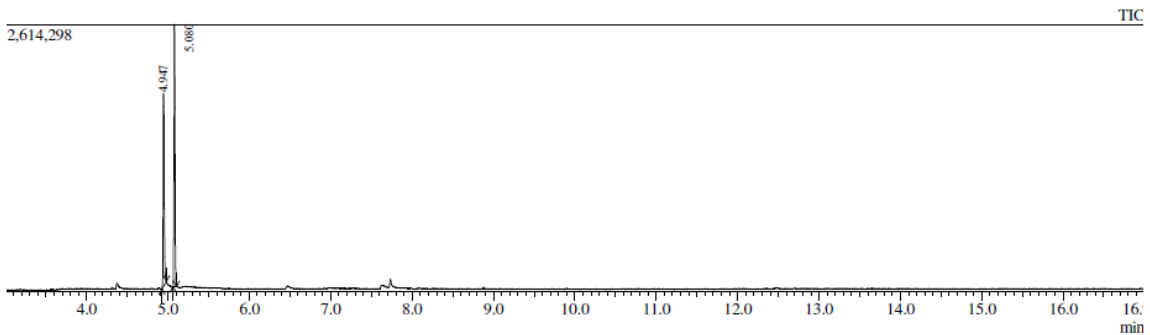

| Peak Report TIC |        |        |        |         |        |         |         |      |      |      |
|-----------------|--------|--------|--------|---------|--------|---------|---------|------|------|------|
| Peak#           | R.Time | I.Time | F.Time | Area    | Area%  | Height  | Height% | A/H  | Mark | Name |
| 1               | 4.947  | 4.925  | 4.980  | 1749613 | 45.38  | 1884185 | 42.32   | 0.93 | MI   |      |
| 2               | 5.080  | 5.060  | 5.105  | 2105816 | 54.62  | 2567614 | 57.68   | 0.82 | MI   |      |
|                 |        |        |        | 3855429 | 100.00 | 4451799 | 100.00  |      |      |      |

### Entry 9 (method A)

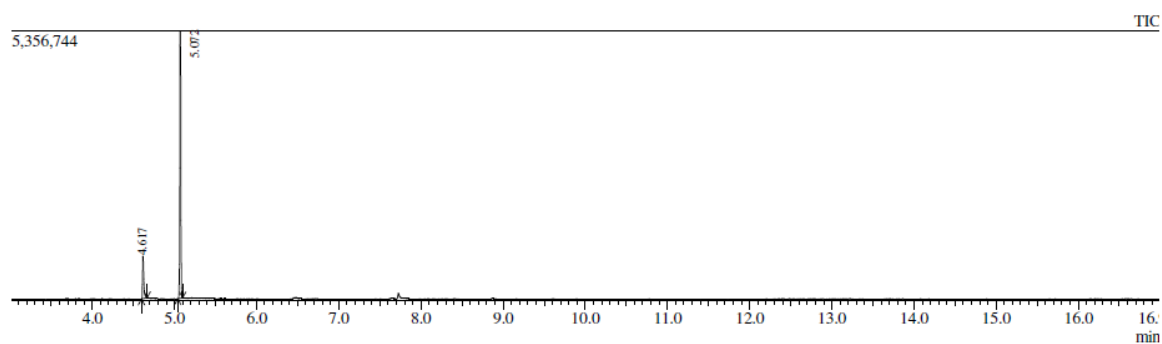

| Peak Report TIC |        |        |        |         |        |         |         |      |      |      |
|-----------------|--------|--------|--------|---------|--------|---------|---------|------|------|------|
| Peak#           | R.Time | I.Time | F.Time | Area    | Area%  | Height  | Height% | A/H  | Mark | Name |
| 1               | 4.617  | 4.600  | 4.670  | 862701  | 15.92  | 846989  | 13.73   | 1.02 | MI   |      |
| 2               | 5.072  | 5.040  | 5.100  | 4556290 | 84.08  | 5320098 | 86.27   | 0.86 | MI   |      |
|                 |        |        |        | 5418991 | 100.00 | 6167087 | 100.00  |      |      |      |

### Entry 10 (method A)

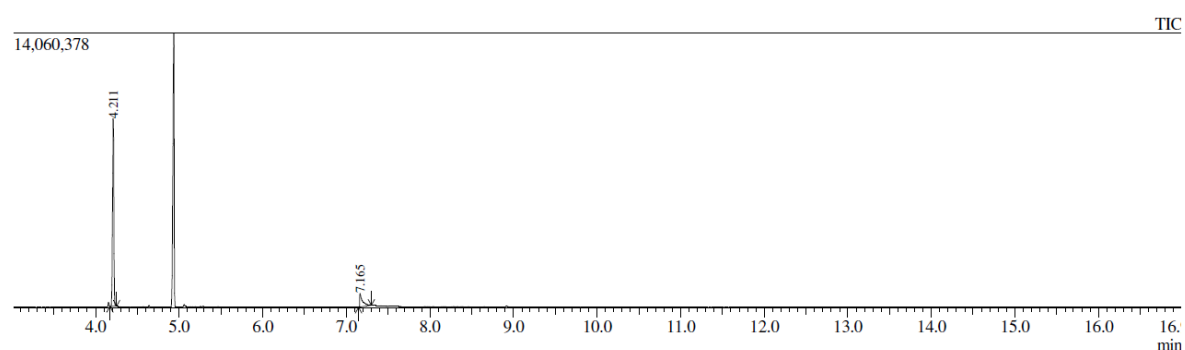

| Peak Report TIC |        |        |        |          |        |          |         |      |      |      |
|-----------------|--------|--------|--------|----------|--------|----------|---------|------|------|------|
| Peak#           | R.Time | I.Time | F.Time | Area     | Area%  | Height   | Height% | A/H  | Mark | Name |
| 1               | 4.211  | 4.170  | 4.250  | 9899906  | 85.44  | 9605216  | 93.33   | 1.03 | MI   |      |
| 2               | 7.165  | 7.145  | 7.300  | 1686852  | 14.56  | 686983   | 6.67    | 2.46 | MI   |      |
|                 |        |        |        | 11586758 | 100.00 | 10292199 | 100.00  |      |      |      |

### Entry 11 (method A)

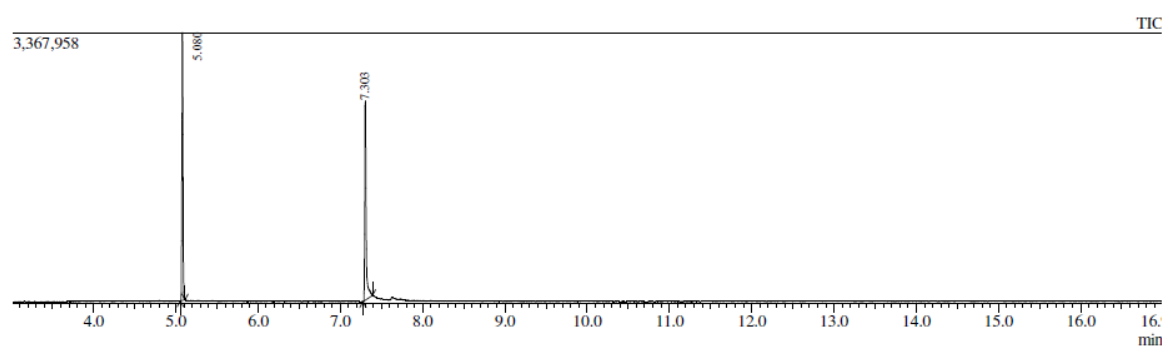

| Peak Report TIC |        |        |        |         |        |         |         |      |      |      |
|-----------------|--------|--------|--------|---------|--------|---------|---------|------|------|------|
| Peak#           | R.Time | I.Time | F.Time | Area    | Area%  | Height  | Height% | A/H  | Mark | Name |
| 1               | 5.080  | 5.055  | 5.110  | 2763233 | 49.26  | 3334468 | 57.32   | 0.83 | MI   |      |
| 2               | 7.303  | 7.275  | 7.390  | 2846577 | 50.74  | 2482569 | 42.68   | 1.15 | MI   |      |
|                 |        |        |        | 5609810 | 100.00 | 5817037 | 100.00  |      |      |      |

# Entry 12 (method A)

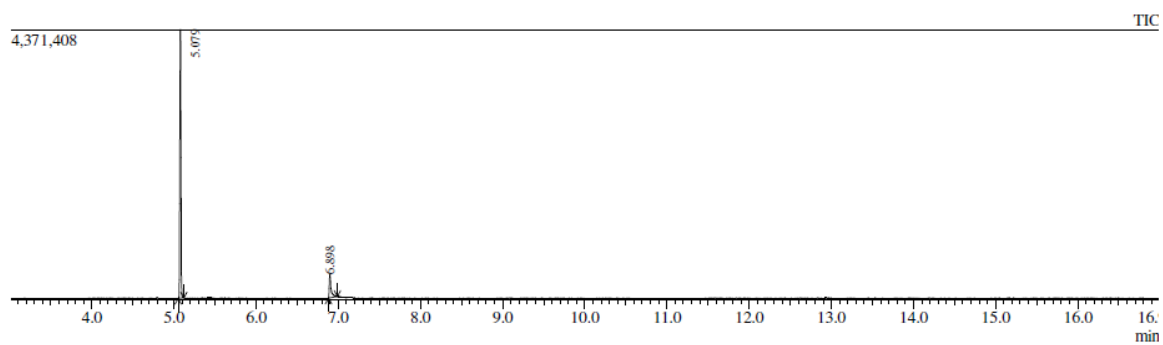

| Peak Report TIC |        |        |        |         |        |         |         |      |      |      |
|-----------------|--------|--------|--------|---------|--------|---------|---------|------|------|------|
| Peak#           | R.Time | L.Time | F.Time | Area    | Area%  | Height  | Height% | A/H  | Mark | Name |
| 1               | 5.079  | 5.050  | 5.120  | 3806120 | 86.93  | 4351276 | 91.89   | 0.87 | MI   |      |
| 2               | 6.898  | 6.880  | 6.990  | 572044  | 13.07  | 383988  | 8.11    | 1.49 | MI   |      |
|                 |        |        |        | 4378164 | 100.00 | 4735264 | 100.00  |      |      |      |



## References

- 1 P.-Y. Renard, H. Schwebel, P. Vayron, L. Josien, A. Valleix and C. Mioskowski, *Chem. – Eur. J.*, 2002, **8**, 2910–2916.
- 2 R. A. Moss and Y. Ihara, *J. Org. Chem.*, 1983, **48**, 588–592.
- 3 T. Yoshino, S. Imori and H. Togo, *Tetrahedron*, 2006, **62**, 1309–1317.
- 4 R. J. P. Corriu, G. F. Lanneau and D. Leclercq, *Tetrahedron*, 1986, **42**, 5591–5600.
- 5 K. Khulbe, P. Roy, A. Radhakrishnan and G. Mugesh, *ChemCatChem*, 2018, **10**, 4826–4831.
- 6 J.-P. Biron and R. Pascal, *J. Am. Chem. Soc.*, 2004, **126**, 9198–9199.
- 7 P. Hendry and A. M. Sargeson, *J. Am. Chem. Soc.*, 1989, **111**, 2521–2527.
- 8 B. van Loo, C. D. Bayer, G. Fischer, S. Jonas, E. Valkov, M. F. Mohamed, A. Vorobieva, C. Dutruel, M. Hyvönen and F. Hollfelder, *J. Am. Chem. Soc.*, 2019, **141**, 370–387.
- 9 M. S. Kumar, K. C. Rajanna, M. Venkateswarlu and K. L. Rao, *Int. J. Chem. Kinet.*, 2016, **48**, 171–196.
- 10 R. A. Gagliano, R. C. Knowlton and L. D. Byers, *J. Org. Chem.*, 1989, **54**, 5247–5250.
